# Supplementary material for: Electron density controlled carbamate ligand binding mode: towards a better understanding of metalloenzyme activity
Source: Royal Society of Chemistry journal article supplement (doi:10.1039/b800687n), 2008-01-01
Supplement: b800687n.pdf [file b800687n.pdf]

**Supplementary Material (ESI) for Dalton Trans.**

**Electronic supplementary information**

**Electron Density Controlled Carbamate Ligand Binding Mode:  
Towards a Better Understanding of Metalloenzyme Activity**

C. Neuhäuser, D. Domide, J. Mautz, E. Kaifer, H.-J. Himmel\*

**Fig. S1** TG curve obtained for **4** at different heating rates

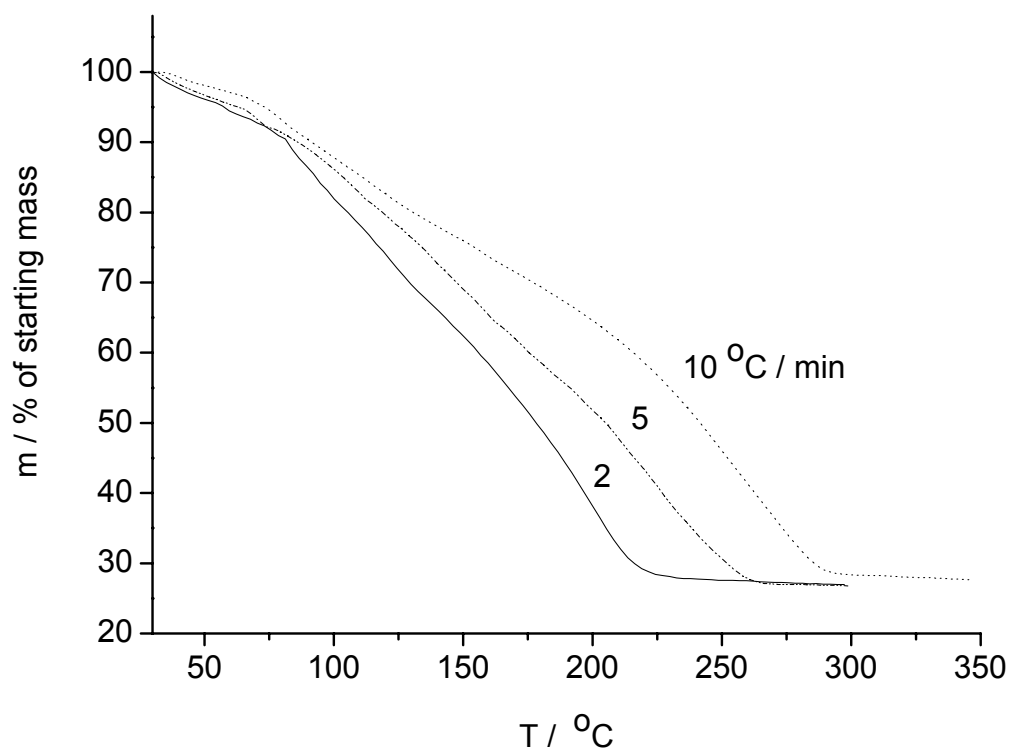

**Fig. S2** Raman spectra for **4** and **5a**, excited at 514 nm.

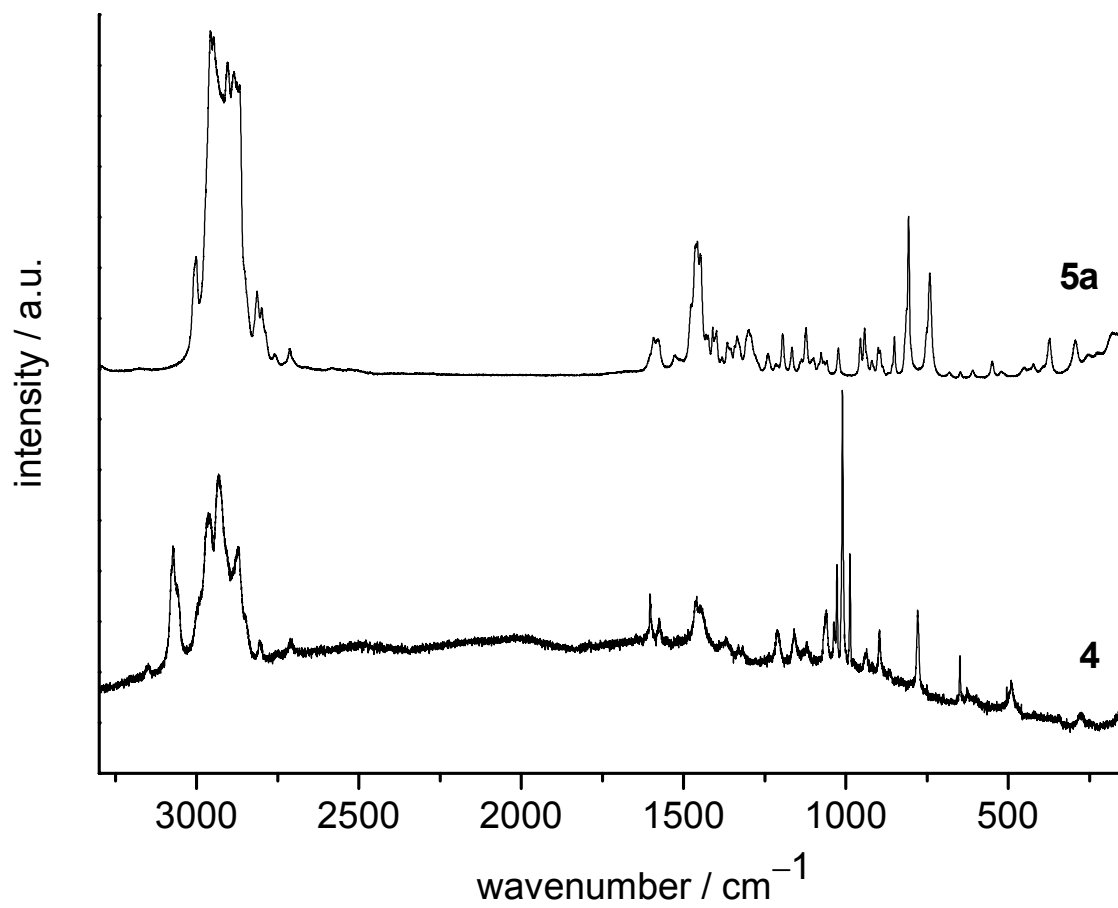

SCF energies, coordinates (in bor and Angstrom) and vibrational properties for compounds **1b**, **5b**, **6a** and **6b**

**1b**

BP/SVP

SCF energy = -2615.8091885210

Coordinates in bor

|                   |                   |                   |    |
|-------------------|-------------------|-------------------|----|
| -0.55528575264386 | 0.00359163269114  | 0.00067694654117  | zn |
| -3.86175150799926 | 1.31213424570560  | 6.34115030605720  | n  |
| -3.88043521176800 | -1.30365308839945 | -6.33155984498681 | n  |
| 2.61679606400444  | -2.39520385965341 | 1.47334889937146  | n  |
| 2.62754170347716  | 2.38626218236569  | -1.47818302531046 | n  |
| -1.08195927924396 | 2.47463727342560  | 3.21912093192007  | o  |
| -3.07431874222142 | -1.24413308667054 | 2.92604718666223  | o  |
| -1.09745289015795 | -2.47240075966598 | -3.21472223243673 | o  |
| -3.07217576599071 | 1.25578177611818  | -2.92433651936602 | o  |
| -2.66031134896179 | 0.84399548044259  | 4.07231972787951  | c  |
| -2.67059181738584 | -0.83753108935733 | -4.06733990378496 | c  |
| 2.85223327432362  | -2.04385070354303 | 4.22386617149623  | c  |
| 2.06549611455098  | -5.05917429555168 | 0.87560401149979  | c  |
| 4.85311058453675  | -1.45694959347570 | 0.09595719861437  | c  |
| 4.86267292791849  | 1.43369652313688  | -0.10818691711741 | c  |
| 2.09279669406336  | 5.05297214618987  | -0.87745003411390 | c  |
| 2.85587988136635  | 2.03576448084971  | -4.22986965649906 | c  |
| -3.87304322911575 | 3.13621362005072  | 6.96134381091674  | h  |
| -5.41852154048431 | 0.24615808066342  | 6.73293839894529  | h  |
| -3.90314650305514 | -3.12919811504957 | -6.94713158161683 | h  |
| -5.43465693156282 | -0.23277635173374 | -6.72027079006724 | h  |
| 3.04311296698361  | -0.01676404471285 | 4.68882875681921  | h  |
| 4.50255279679228  | -3.10714164789212 | 4.99893091081919  | h  |
| 1.10149213294036  | -2.72833212649970 | 5.13465753913759  | h  |
| 1.70365032333936  | -5.24909363852853 | -1.17237659420996 | h  |
| 0.32099813533328  | -5.62127790218519 | 1.88241311959699  | h  |
| 3.64155636358715  | -6.33225851454949 | 1.46492661838702  | h  |
| 4.81936588566402  | -2.30348056525738 | -1.81977833094813 | h  |
| 6.64359163085349  | -2.10118601853212 | 1.01279171013801  | h  |
| 6.65359280869831  | 2.06532077816884  | -1.03284893871548 | h  |
| 4.84332000287704  | 2.28168525865192  | 1.80725344535730  | h  |
| 1.73431456846800  | 5.24319984902027  | 1.17117383766744  | h  |
| 0.35065215573547  | 5.62678567194969  | -1.88184931180191 | h  |
| 3.67560171708848  | 6.31746326345090  | -1.46732882213318 | h  |
| 3.03499229480711  | 0.00797066136374  | -4.69633879791572 | h  |
| 4.51072053118052  | 3.09005354222698  | -5.00727849799835 | h  |
| 1.10721105409325  | 2.73005030514943  | -5.13709853213772 | h  |

Coordinates in Angstrom

|        |    |    |   |        |        |        |
|--------|----|----|---|--------|--------|--------|
| HETATM | 1  | zn | 1 | -0.294 | 0.002  | 0.000  |
| HETATM | 2  | n  | 1 | -2.044 | 0.694  | 3.356  |
| HETATM | 3  | n  | 1 | -2.053 | -0.690 | -3.351 |
| HETATM | 4  | n  | 1 | 1.385  | -1.267 | 0.780  |
| HETATM | 5  | n  | 1 | 1.390  | 1.263  | -0.782 |
| HETATM | 6  | o  | 1 | -0.573 | 1.310  | 1.703  |
| HETATM | 7  | o  | 1 | -1.627 | -0.658 | 1.548  |
| HETATM | 8  | o  | 1 | -0.581 | -1.308 | -1.701 |
| HETATM | 9  | o  | 1 | -1.626 | 0.665  | -1.547 |
| HETATM | 10 | c  | 1 | -1.408 | 0.447  | 2.155  |
| HETATM | 11 | c  | 1 | -1.413 | -0.443 | -2.152 |
| HETATM | 12 | c  | 1 | 1.509  | -1.082 | 2.235  |
| HETATM | 13 | c  | 1 | 1.093  | -2.677 | 0.463  |
| HETATM | 14 | c  | 1 | 2.568  | -0.771 | 0.051  |
| HETATM | 15 | c  | 1 | 2.573  | 0.759  | -0.057 |
| HETATM | 16 | c  | 1 | 1.107  | 2.674  | -0.464 |
| HETATM | 17 | c  | 1 | 1.511  | 1.077  | -2.238 |
| HETATM | 18 | h  | 1 | -2.050 | 1.660  | 3.684  |
| HETATM | 19 | h  | 1 | -2.867 | 0.130  | 3.563  |
| HETATM | 20 | h  | 1 | -2.065 | -1.656 | -3.676 |
| HETATM | 21 | h  | 1 | -2.876 | -0.123 | -3.556 |
| HETATM | 22 | h  | 1 | 1.610  | -0.009 | 2.481  |
| HETATM | 23 | h  | 1 | 2.383  | -1.644 | 2.645  |
| HETATM | 24 | h  | 1 | 0.583  | -1.444 | 2.717  |
| HETATM | 25 | h  | 1 | 0.902  | -2.778 | -0.620 |
| HETATM | 26 | h  | 1 | 0.170  | -2.975 | 0.996  |
| HETATM | 27 | h  | 1 | 1.927  | -3.351 | 0.775  |
| HETATM | 28 | h  | 1 | 2.550  | -1.219 | -0.963 |
| HETATM | 29 | h  | 1 | 3.516  | -1.112 | 0.536  |
| HETATM | 30 | h  | 1 | 3.521  | 1.093  | -0.547 |
| HETATM | 31 | h  | 1 | 2.563  | 1.207  | 0.956  |
| HETATM | 32 | h  | 1 | 0.918  | 2.775  | 0.620  |
| HETATM | 33 | h  | 1 | 0.186  | 2.978  | -0.996 |
| HETATM | 34 | h  | 1 | 1.945  | 3.343  | -0.776 |
| HETATM | 35 | h  | 1 | 1.606  | 0.004  | -2.485 |
| HETATM | 36 | h  | 1 | 2.387  | 1.635  | -2.650 |
| HETATM | 37 | h  | 1 | 0.586  | 1.445  | -2.718 |

Vibrational Properties

| # | mode | symmetry | wave number | IR intensity | selection rules |
|---|------|----------|-------------|--------------|-----------------|
| # |      | cm**(-1) | km/mol      | IR           | RAMAN           |
| 1 |      | 0.00     | 0.00000     | -            | -               |
| 2 |      | 0.00     | 0.00000     | -            | -               |
| 3 |      | 0.00     | 0.00000     | -            | -               |
| 4 |      | 0.00     | 0.00000     | -            | -               |
| 5 |      | 0.00     | 0.00000     | -            | -               |
| 6 |      | 0.00     | 0.00000     | -            | -               |

Supplementary Material (ESI) for Dalton Transactions  
This journal is (c) The Royal Society of Chemistry 2008

|    |   |         |           |     |     |
|----|---|---------|-----------|-----|-----|
| 7  | a | 41.11   | 0.04762   | YES | YES |
| 8  | a | 47.88   | 0.02770   | YES | YES |
| 9  | a | 62.10   | 0.20206   | YES | YES |
| 10 | a | 65.28   | 2.42003   | YES | YES |
| 11 | a | 88.63   | 0.38545   | YES | YES |
| 12 | a | 93.73   | 0.05319   | YES | YES |
| 13 | a | 106.84  | 0.62015   | YES | YES |
| 14 | a | 131.84  | 2.34786   | YES | YES |
| 15 | a | 136.04  | 8.73453   | YES | YES |
| 16 | a | 148.35  | 2.50136   | YES | YES |
| 17 | a | 161.42  | 18.57397  | YES | YES |
| 18 | a | 175.12  | 9.34323   | YES | YES |
| 19 | a | 178.96  | 12.98142  | YES | YES |
| 20 | a | 184.34  | 8.60932   | YES | YES |
| 21 | a | 190.96  | 1.64520   | YES | YES |
| 22 | a | 197.54  | 4.28346   | YES | YES |
| 23 | a | 232.38  | 0.18450   | YES | YES |
| 24 | a | 256.13  | 31.73510  | YES | YES |
| 25 | a | 258.66  | 0.23235   | YES | YES |
| 26 | a | 269.95  | 7.69031   | YES | YES |
| 27 | a | 273.49  | 0.88456   | YES | YES |
| 28 | a | 287.31  | 3.07168   | YES | YES |
| 29 | a | 313.58  | 160.56893 | YES | YES |
| 30 | a | 353.84  | 4.14124   | YES | YES |
| 31 | a | 378.45  | 4.55832   | YES | YES |
| 32 | a | 408.28  | 322.06689 | YES | YES |
| 33 | a | 412.08  | 53.74901  | YES | YES |
| 34 | a | 420.33  | 16.33399  | YES | YES |
| 35 | a | 434.33  | 18.82791  | YES | YES |
| 36 | a | 435.90  | 3.52074   | YES | YES |
| 37 | a | 456.78  | 17.37498  | YES | YES |
| 38 | a | 479.02  | 2.91378   | YES | YES |
| 39 | a | 480.29  | 8.59952   | YES | YES |
| 40 | a | 536.66  | 0.93924   | YES | YES |
| 41 | a | 537.16  | 6.36706   | YES | YES |
| 42 | a | 570.64  | 7.28127   | YES | YES |
| 43 | a | 696.32  | 64.28967  | YES | YES |
| 44 | a | 699.95  | 31.45597  | YES | YES |
| 45 | a | 768.62  | 20.62346  | YES | YES |
| 46 | a | 775.64  | 23.24705  | YES | YES |
| 47 | a | 777.12  | 17.38806  | YES | YES |
| 48 | a | 793.65  | 42.39161  | YES | YES |
| 49 | a | 930.40  | 6.69011   | YES | YES |
| 50 | a | 942.79  | 48.98254  | YES | YES |
| 51 | a | 1016.50 | 15.53826  | YES | YES |
| 52 | a | 1016.83 | 10.61135  | YES | YES |
| 53 | a | 1026.40 | 28.25097  | YES | YES |
| 54 | a | 1028.92 | 0.52668   | YES | YES |
| 55 | a | 1029.22 | 0.73586   | YES | YES |
| 56 | a | 1030.40 | 0.25645   | YES | YES |
| 57 | a | 1053.65 | 11.29007  | YES | YES |

Supplementary Material (ESI) for Dalton Transactions  
This journal is (c) The Royal Society of Chemistry 2008

|     |   |         |           |     |     |
|-----|---|---------|-----------|-----|-----|
| 58  | a | 1057.64 | 11.70622  | YES | YES |
| 59  | a | 1058.11 | 18.84795  | YES | YES |
| 60  | a | 1075.69 | 2.21819   | YES | YES |
| 61  | a | 1078.74 | 0.16671   | YES | YES |
| 62  | a | 1117.67 | 19.81652  | YES | YES |
| 63  | a | 1144.35 | 3.34546   | YES | YES |
| 64  | a | 1169.62 | 3.80487   | YES | YES |
| 65  | a | 1214.25 | 0.38099   | YES | YES |
| 66  | a | 1239.07 | 0.19745   | YES | YES |
| 67  | a | 1239.99 | 5.84993   | YES | YES |
| 68  | a | 1267.19 | 1.65251   | YES | YES |
| 69  | a | 1277.31 | 26.01853  | YES | YES |
| 70  | a | 1325.23 | 4.97380   | YES | YES |
| 71  | a | 1358.12 | 6.57088   | YES | YES |
| 72  | a | 1371.34 | 0.17601   | YES | YES |
| 73  | a | 1373.73 | 1.80914   | YES | YES |
| 74  | a | 1399.34 | 0.02980   | YES | YES |
| 75  | a | 1400.20 | 14.43632  | YES | YES |
| 76  | a | 1405.56 | 1.45349   | YES | YES |
| 77  | a | 1407.11 | 4.11786   | YES | YES |
| 78  | a | 1418.07 | 24.26856  | YES | YES |
| 79  | a | 1423.70 | 36.61325  | YES | YES |
| 80  | a | 1424.82 | 8.69532   | YES | YES |
| 81  | a | 1425.06 | 8.96668   | YES | YES |
| 82  | a | 1431.25 | 9.97071   | YES | YES |
| 83  | a | 1431.70 | 66.09949  | YES | YES |
| 84  | a | 1443.05 | 115.82512 | YES | YES |
| 85  | a | 1443.51 | 55.39607  | YES | YES |
| 86  | a | 1444.51 | 259.53810 | YES | YES |
| 87  | a | 1450.80 | 52.13003  | YES | YES |
| 88  | a | 1562.15 | 570.71888 | YES | YES |
| 89  | a | 1566.33 | 417.57898 | YES | YES |
| 90  | a | 1585.42 | 28.03294  | YES | YES |
| 91  | a | 1598.52 | 406.31687 | YES | YES |
| 92  | a | 2900.72 | 2.31035   | YES | YES |
| 93  | a | 2903.57 | 11.73411  | YES | YES |
| 94  | a | 2904.03 | 41.86399  | YES | YES |
| 95  | a | 2907.12 | 5.25128   | YES | YES |
| 96  | a | 2908.27 | 199.93460 | YES | YES |
| 97  | a | 2915.22 | 189.23016 | YES | YES |
| 98  | a | 3015.42 | 0.63025   | YES | YES |
| 99  | a | 3031.60 | 18.41230  | YES | YES |
| 100 | a | 3045.75 | 4.93727   | YES | YES |
| 101 | a | 3046.11 | 6.26335   | YES | YES |
| 102 | a | 3049.58 | 4.34690   | YES | YES |
| 103 | a | 3049.94 | 8.87351   | YES | YES |
| 104 | a | 3094.21 | 4.33589   | YES | YES |
| 105 | a | 3094.39 | 4.16259   | YES | YES |
| 106 | a | 3095.80 | 2.27918   | YES | YES |
| 107 | a | 3096.24 | 2.56034   | YES | YES |
| 108 | a | 3502.55 | 27.11903  | YES | YES |

|     |   |         |          |     |     |
|-----|---|---------|----------|-----|-----|
| 109 | a | 3502.69 | 34.60703 | YES | YES |
| 110 | a | 3629.91 | 31.70055 | YES | YES |
| 111 | a | 3630.31 | 33.28482 | YES | YES |

## BP/TZVPP

SCF energy = -2617.0176242360

### Coordinates in bor

|                   |                   |                   |    |
|-------------------|-------------------|-------------------|----|
| -0.55212682850428 | 0.00018601768898  | 0.00011422069075  | zn |
| -3.96968510174439 | 1.35306455472193  | 6.28438646493943  | n  |
| -3.97073155580357 | -1.35286701476256 | -6.28376175025016 | n  |
| 2.65614340905170  | -2.36275372154049 | 1.50548669271036  | n  |
| 2.65716318514204  | 2.36194257265587  | -1.50537438797353 | n  |
| -1.15383635203516 | 2.50381003135610  | 3.19600265028110  | o  |
| -3.11182739584214 | -1.23406070162595 | 2.91641626362621  | o  |
| -1.15565407033488 | -2.50392821574307 | -3.19464060330913 | o  |
| -3.10931472546198 | 1.23651918368315  | -2.91849439331578 | o  |
| -2.72911890587474 | 0.86792882671598  | 4.04014431525953  | c  |
| -2.72923493948367 | -0.86692090232921 | -4.04004373948012 | c  |
| 2.94222948742051  | -1.99998830528705 | 4.25515853347419  | c  |
| 2.17703959636402  | -5.05690926437674 | 0.96518673422734  | c  |
| 4.89536718694031  | -1.44150135863523 | 0.11308876081764  | c  |
| 4.89678156256209  | 1.43832140707831  | -0.11538463543504 | c  |
| 2.18037259420786  | 5.05600939454059  | -0.96334969340851 | c  |
| 2.94128124690484  | 2.00029598036998  | -4.25554211956484 | c  |
| -4.03294331903879 | 3.18450594212542  | 6.83661066107546  | h  |
| -5.53623381848220 | 0.30598183145967  | 6.62088681680815  | h  |
| -4.03656479006133 | -3.18486802088918 | -6.83409668187927 | h  |
| -5.53618275108163 | -0.30423318677919 | -6.62058477796889 | h  |
| 3.17426797413437  | 0.00653154251097  | 4.70427285784173  | h  |
| 4.58350398845486  | -3.07205904266365 | 4.98219394345170  | h  |
| 1.22141742537528  | -2.66312421215814 | 5.19543994787839  | h  |
| 1.83965395665381  | -5.30496713705390 | -1.06124138763829 | h  |
| 0.47030844842328  | -5.64516546459370 | 1.98153551804454  | h  |
| 3.78162747781678  | -6.24876974196030 | 1.57741743804456  | h  |
| 4.85326294314238  | -2.30109160698632 | -1.77541001527084 | h  |
| 6.66245293399389  | -2.07165983443019 | 1.03820749496332  | h  |
| 6.66364613867770  | 2.06637047542951  | -1.04231517813727 | h  |
| 4.85787765873610  | 2.29789294831029  | 1.77317691021846  | h  |
| 1.84403047680149  | 5.30327292331339  | 1.06330651124391  | h  |
| 0.47370998824534  | 5.64620104973208  | -1.97857190456159 | h  |
| 3.78549295286955  | 6.24714584475576  | -1.57554123883329 | h  |
| 3.17153074478312  | -0.00622081045061 | -4.70554806856069 | h  |
| 4.58298699163075  | 3.07134339807002  | -4.98291203938164 | h  |
| 1.22037570721266  | 2.66516761917255  | -5.19426970924824 | h  |

### Coordinates in Angstrom

|        |    |    |   |        |        |        |
|--------|----|----|---|--------|--------|--------|
| HETATM | 1  | zn | 1 | -0.292 | 0.000  | 0.000  |
| HETATM | 2  | n  | 1 | -2.101 | 0.716  | 3.326  |
| HETATM | 3  | n  | 1 | -2.101 | -0.716 | -3.325 |
| HETATM | 4  | n  | 1 | 1.406  | -1.250 | 0.797  |
| HETATM | 5  | n  | 1 | 1.406  | 1.250  | -0.797 |
| HETATM | 6  | o  | 1 | -0.611 | 1.325  | 1.691  |
| HETATM | 7  | o  | 1 | -1.647 | -0.653 | 1.543  |
| HETATM | 8  | o  | 1 | -0.612 | -1.325 | -1.691 |
| HETATM | 9  | o  | 1 | -1.645 | 0.654  | -1.544 |
| HETATM | 10 | c  | 1 | -1.444 | 0.459  | 2.138  |
| HETATM | 11 | c  | 1 | -1.444 | -0.459 | -2.138 |
| HETATM | 12 | c  | 1 | 1.557  | -1.058 | 2.252  |
| HETATM | 13 | c  | 1 | 1.152  | -2.676 | 0.511  |
| HETATM | 14 | c  | 1 | 2.591  | -0.763 | 0.060  |
| HETATM | 15 | c  | 1 | 2.591  | 0.761  | -0.061 |
| HETATM | 16 | c  | 1 | 1.154  | 2.676  | -0.510 |
| HETATM | 17 | c  | 1 | 1.556  | 1.059  | -2.252 |
| HETATM | 18 | h  | 1 | -2.134 | 1.685  | 3.618  |
| HETATM | 19 | h  | 1 | -2.930 | 0.162  | 3.504  |
| HETATM | 20 | h  | 1 | -2.136 | -1.685 | -3.616 |
| HETATM | 21 | h  | 1 | -2.930 | -0.161 | -3.503 |
| HETATM | 22 | h  | 1 | 1.680  | 0.003  | 2.489  |
| HETATM | 23 | h  | 1 | 2.425  | -1.626 | 2.636  |
| HETATM | 24 | h  | 1 | 0.646  | -1.409 | 2.749  |
| HETATM | 25 | h  | 1 | 0.974  | -2.807 | -0.562 |
| HETATM | 26 | h  | 1 | 0.249  | -2.987 | 1.049  |
| HETATM | 27 | h  | 1 | 2.001  | -3.307 | 0.835  |
| HETATM | 28 | h  | 1 | 2.568  | -1.218 | -0.940 |
| HETATM | 29 | h  | 1 | 3.526  | -1.096 | 0.549  |
| HETATM | 30 | h  | 1 | 3.526  | 1.093  | -0.552 |
| HETATM | 31 | h  | 1 | 2.571  | 1.216  | 0.938  |
| HETATM | 32 | h  | 1 | 0.976  | 2.806  | 0.563  |
| HETATM | 33 | h  | 1 | 0.251  | 2.988  | -1.047 |
| HETATM | 34 | h  | 1 | 2.003  | 3.306  | -0.834 |
| HETATM | 35 | h  | 1 | 1.678  | -0.003 | -2.490 |
| HETATM | 36 | h  | 1 | 2.425  | 1.625  | -2.637 |
| HETATM | 37 | h  | 1 | 0.646  | 1.410  | -2.749 |

### B3LYP/SVP

SCF energy = -2614.9462270240

Coordinates in bor

|                   |                   |                   |    |
|-------------------|-------------------|-------------------|----|
| -0.56560023173991 | 0.00067588781973  | 0.00033973181699  | zn |
| -3.89808998857298 | 1.32930259811476  | 6.29820703878865  | n  |
| -3.90666808084204 | -1.32820306418963 | -6.29311867479047 | n  |
| 2.64536647699297  | -2.38761080306890 | 1.47975748013904  | n  |
| 2.64613215400690  | 2.38678419552917  | -1.48295106262938 | n  |
| -1.11448650087742 | 2.45907114651816  | 3.20339910858507  | o  |



|                   |                   |                   |   |
|-------------------|-------------------|-------------------|---|
| -3.07158090790507 | -1.22918399452501 | 2.92780010541587  | o |
| -1.11260992343733 | -2.45532106364839 | -3.20661713412817 | o |
| -3.08067525635584 | 1.22623353495493  | -2.91962612955760 | o |
| -2.68119119026161 | 0.84749724466311  | 4.06113381600497  | c |
| -2.68625205209524 | -0.84705822775022 | -4.05784041966301 | c |
| 2.88296933769463  | -2.04720238889995 | 4.22582992229367  | c |
| 2.10315065055221  | -5.04699952991707 | 0.87922814844397  | c |
| 4.87441655526763  | -1.44468686021936 | 0.10831296487664  | c |
| 4.87670844309471  | 1.43940532867192  | -0.11696720829369 | c |
| 2.10951431427432  | 5.04655961483586  | -0.87896432935869 | c |
| 2.87763584767438  | 2.04827057593677  | -4.22988526908392 | c |
| -3.88422260773963 | 3.13033195146695  | 6.94068266641278  | h |
| -5.41205889889584 | 0.24162269918045  | 6.72518708115423  | h |
| -3.88844031684659 | -3.12792316382455 | -6.93925263774104 | h |
| -5.42543338552052 | -0.24465526059603 | -6.71418891909496 | h |
| 3.08081181092730  | -0.03804040570119 | 4.69895574879785  | h |
| 4.52417958094832  | -3.10685993222430 | 4.98372739868581  | h |
| 1.15060999083175  | -2.73332584075271 | 5.13641167518334  | h |
| 1.75155439821570  | -5.24174136630583 | -1.15474768781411 | h |
| 0.37329088112737  | -5.61727927210830 | 1.87726527945298  | h |
| 3.67462007002078  | -6.30248561278342 | 1.46542226684514  | h |
| 4.85978531324607  | -2.29631476636472 | -1.78799439775181 | h |
| 6.64892494698523  | -2.06678804209937 | 1.03471722252085  | h |
| 6.65007516980862  | 2.05814631749049  | -1.04780665065316 | h |
| 4.86852830328892  | 2.29095472451971  | 1.77935202719120  | h |
| 1.76126164488736  | 5.23992900087430  | 1.15572061047893  | h |
| 0.37921560574199  | 5.62123655578751  | -1.87369842760044 | h |
| 3.68233471214246  | 6.29986297371556  | -1.46618717647790 | h |
| 3.07134176998707  | 0.03921450992217  | -4.70491157473711 | h |
| 4.51880508567129  | 3.10624848872220  | -4.99020602937402 | h |
| 1.14445375405403  | 2.73776576661019  | -5.13641487344257 | h |

### Coordinates in Angstrom

|        |    |    |   |        |        |        |
|--------|----|----|---|--------|--------|--------|
| HETATM | 1  | zn | 1 | -0.299 | 0.000  | 0.000  |
| HETATM | 2  | n  | 1 | -2.063 | 0.703  | 3.333  |
| HETATM | 3  | n  | 1 | -2.067 | -0.703 | -3.330 |
| HETATM | 4  | n  | 1 | 1.400  | -1.263 | 0.783  |
| HETATM | 5  | n  | 1 | 1.400  | 1.263  | -0.785 |
| HETATM | 6  | o  | 1 | -0.590 | 1.301  | 1.695  |
| HETATM | 7  | o  | 1 | -1.625 | -0.650 | 1.549  |
| HETATM | 8  | o  | 1 | -0.589 | -1.299 | -1.697 |
| HETATM | 9  | o  | 1 | -1.630 | 0.649  | -1.545 |
| HETATM | 10 | c  | 1 | -1.419 | 0.448  | 2.149  |
| HETATM | 11 | c  | 1 | -1.422 | -0.448 | -2.147 |
| HETATM | 12 | c  | 1 | 1.526  | -1.083 | 2.236  |
| HETATM | 13 | c  | 1 | 1.113  | -2.671 | 0.465  |
| HETATM | 14 | c  | 1 | 2.579  | -0.764 | 0.057  |
| HETATM | 15 | c  | 1 | 2.581  | 0.762  | -0.062 |
| HETATM | 16 | c  | 1 | 1.116  | 2.671  | -0.465 |

|        |    |   |   |        |        |        |
|--------|----|---|---|--------|--------|--------|
| HETATM | 17 | c | 1 | 1.523  | 1.084  | -2.238 |
| HETATM | 18 | h | 1 | -2.055 | 1.656  | 3.673  |
| HETATM | 19 | h | 1 | -2.864 | 0.128  | 3.559  |
| HETATM | 20 | h | 1 | -2.058 | -1.655 | -3.672 |
| HETATM | 21 | h | 1 | -2.871 | -0.129 | -3.553 |
| HETATM | 22 | h | 1 | 1.630  | -0.020 | 2.487  |
| HETATM | 23 | h | 1 | 2.394  | -1.644 | 2.637  |
| HETATM | 24 | h | 1 | 0.609  | -1.446 | 2.718  |
| HETATM | 25 | h | 1 | 0.927  | -2.774 | -0.611 |
| HETATM | 26 | h | 1 | 0.198  | -2.973 | 0.993  |
| HETATM | 27 | h | 1 | 1.945  | -3.335 | 0.775  |
| HETATM | 28 | h | 1 | 2.572  | -1.215 | -0.946 |
| HETATM | 29 | h | 1 | 3.518  | -1.094 | 0.548  |
| HETATM | 30 | h | 1 | 3.519  | 1.089  | -0.554 |
| HETATM | 31 | h | 1 | 2.576  | 1.212  | 0.942  |
| HETATM | 32 | h | 1 | 0.932  | 2.773  | 0.612  |
| HETATM | 33 | h | 1 | 0.201  | 2.975  | -0.992 |
| HETATM | 34 | h | 1 | 1.949  | 3.334  | -0.776 |
| HETATM | 35 | h | 1 | 1.625  | 0.021  | -2.490 |
| HETATM | 36 | h | 1 | 2.391  | 1.644  | -2.641 |
| HETATM | 37 | h | 1 | 0.606  | 1.449  | -2.718 |

## 5b

### BP/SVP

SCF energy = -2993.0330521570

### Coordinates in bo:

|                   |                   |                   |    |
|-------------------|-------------------|-------------------|----|
| -0.00763148482948 | 0.02935114170741  | 1.85036217872102  | zn |
| -0.60577745575163 | 3.03536289564632  | 3.99178006073891  | o  |
| -4.32368330460880 | 4.36146671474397  | 2.21590202666917  | o  |
| 0.59566182534912  | -2.90329563056155 | 4.08951220468083  | o  |
| 4.28987071019478  | -4.31336789900257 | 2.32938056560625  | o  |
| 3.27049007844818  | 0.13745163989470  | -0.10594516728605 | n  |
| 4.16709976116375  | -1.49626903476884 | 0.59762188267949  | h  |
| 6.51021240840299  | 0.34143668890101  | -3.19825974054577 | n  |
| 3.73313513070971  | 3.76641811029638  | -2.64214603261289 | n  |
| -3.28789345299171 | -0.14801095509396 | -0.09548445179371 | n  |
| -4.19477533445983 | 1.49834113443627  | 0.56361505584813  | h  |
| -3.70364663199462 | -3.83400519586664 | -2.55502267525716 | n  |
| -6.50155849985970 | -0.44333764617411 | -3.20799007803443 | n  |
| -2.56566715070551 | 6.51409922793900  | 5.51213988056722  | n  |
| 2.54029709876053  | -6.34653904839579 | 5.70498362382435  | n  |
| 4.45302171257592  | 1.36124558391330  | -1.89583300959692 | c  |
| 6.96169885830653  | -2.37035133059765 | -3.02370400067293 | c  |
| 7.94800669450612  | -2.93073069387066 | -1.24956937336836 | h  |
| 8.13264767658406  | -2.97063204877433 | -4.65517916140121 | h  |

|                    |                   |                   |   |
|--------------------|-------------------|-------------------|---|
| 5.15025532936834   | -3.40774991785838 | -3.07303317270463 | h |
| 8.77417546083871   | 1.85636888019420  | -3.63883420348513 | c |
| 8.35656899518236   | 3.87847436290346  | -3.33841551914328 | h |
| 9.50032192704306   | 1.60092862201592  | -5.59384175881664 | h |
| 10.31103569113057  | 1.31152904612100  | -2.30441065912068 | h |
| 3.73920600945036   | 4.50818778221658  | -5.29405224538184 | c |
| 4.65115601532381   | 3.03087133097041  | -6.45167230165441 | h |
| 4.75211947337673   | 6.32595589216439  | -5.59392469419223 | h |
| 1.76691934898304   | 4.76066101576395  | -5.98965010856154 | h |
| 2.09673627742121   | 5.26589873783622  | -1.01564212673257 | c |
| 0.05262467678718   | 4.95749072830766  | -1.41760222366646 | h |
| 2.51698485498663   | 7.30020152718102  | -1.30692298558218 | h |
| 2.40846463963831   | 4.78041534558318  | 0.99013037251801  | h |
| -4.44738763694112  | -1.41783934026660 | -1.86811597363007 | c |
| -2.07212669128054  | -5.28361608072265 | -0.87879188589281 | c |
| -0.02587947291281  | -4.96329999160536 | -1.26102779739075 | h |
| -2.46879699641982  | -7.32749080722378 | -1.13370153430521 | h |
| -2.41474317465493  | -4.76028380227725 | 1.11227590932062  | h |
| -3.67157522849063  | -4.63003589077900 | -5.19103429917150 | c |
| -4.58404536185334  | -3.18609166762949 | -6.38972497675405 | h |
| -4.66347820295336  | -6.46339438678734 | -5.46475719018693 | h |
| -1.68907482863792  | -4.87689858188210 | -5.85904589896107 | h |
| -8.74422155083189  | -1.98915903725490 | -3.64883851319957 | c |
| -8.31303110481793  | -3.99954276759820 | -3.29426716893552 | h |
| -9.44251475369665  | -1.78619417493944 | -5.62011129486171 | h |
| -10.30629932471653 | -1.42727010551849 | -2.35135603842458 | h |
| -6.98197687874933  | 2.26631083388165  | -3.09357094427286 | c |
| -8.00891951475640  | 2.84860435428116  | -1.34973139330469 | h |
| -8.12714263014102  | 2.82511755450329  | -4.75787312515938 | h |
| -5.18036049139494  | 3.32110828070665  | -3.12569488714197 | h |
| -2.55710036909394  | 4.51691759347234  | 3.79894396148564  | c |
| -4.25987863945695  | 7.39743200944500  | 5.76488763038846  | h |
| -1.44357572602403  | 6.32367029538539  | 7.06877503344626  | h |
| 2.53411000664545   | -4.40442360782257 | 3.92992133943447  | c |
| 4.22850520091983   | -7.23648555561177 | 5.97383968909265  | h |
| 1.42871964297633   | -6.09913090352051 | 7.26099136656774  | h |

### Coordinates in Angstrom:

REMARK test basis

|        |    |    |   |        |        |        |
|--------|----|----|---|--------|--------|--------|
| HETATM | 1  | zn | 1 | -0.004 | 0.016  | 0.979  |
| HETATM | 2  | o  | 1 | -0.321 | 1.606  | 2.112  |
| HETATM | 3  | o  | 1 | -2.288 | 2.308  | 1.173  |
| HETATM | 4  | o  | 1 | 0.315  | -1.536 | 2.164  |
| HETATM | 5  | o  | 1 | 2.270  | -2.283 | 1.233  |
| HETATM | 6  | n  | 1 | 1.731  | 0.073  | -0.056 |
| HETATM | 7  | h  | 1 | 2.205  | -0.792 | 0.316  |
| HETATM | 8  | n  | 1 | 3.445  | 0.181  | -1.692 |
| HETATM | 9  | n  | 1 | 1.975  | 1.993  | -1.398 |
| HETATM | 10 | n  | 1 | -1.740 | -0.078 | -0.051 |

|        |    |   |   |        |        |        |
|--------|----|---|---|--------|--------|--------|
| HETATM | 11 | h | 1 | -2.220 | 0.793  | 0.298  |
| HETATM | 12 | n | 1 | -1.960 | -2.029 | -1.352 |
| HETATM | 13 | n | 1 | -3.440 | -0.235 | -1.698 |
| HETATM | 14 | n | 1 | -1.358 | 3.447  | 2.917  |
| HETATM | 15 | n | 1 | 1.344  | -3.358 | 3.019  |
| HETATM | 16 | c | 1 | 2.356  | 0.720  | -1.003 |
| HETATM | 17 | c | 1 | 3.684  | -1.254 | -1.600 |
| HETATM | 18 | h | 1 | 4.206  | -1.551 | -0.661 |
| HETATM | 19 | h | 1 | 4.304  | -1.572 | -2.463 |
| HETATM | 20 | h | 1 | 2.725  | -1.803 | -1.626 |
| HETATM | 21 | c | 1 | 4.643  | 0.982  | -1.926 |
| HETATM | 22 | h | 1 | 4.422  | 2.052  | -1.767 |
| HETATM | 23 | h | 1 | 5.027  | 0.847  | -2.960 |
| HETATM | 24 | h | 1 | 5.456  | 0.694  | -1.219 |
| HETATM | 25 | c | 1 | 1.979  | 2.386  | -2.801 |
| HETATM | 26 | h | 1 | 2.461  | 1.604  | -3.414 |
| HETATM | 27 | h | 1 | 2.515  | 3.348  | -2.960 |
| HETATM | 28 | h | 1 | 0.935  | 2.519  | -3.170 |
| HETATM | 29 | c | 1 | 1.110  | 2.787  | -0.537 |
| HETATM | 30 | h | 1 | 0.028  | 2.623  | -0.750 |
| HETATM | 31 | h | 1 | 1.332  | 3.863  | -0.692 |
| HETATM | 32 | h | 1 | 1.275  | 2.530  | 0.524  |
| HETATM | 33 | c | 1 | -2.353 | -0.750 | -0.989 |
| HETATM | 34 | c | 1 | -1.097 | -2.796 | -0.465 |
| HETATM | 35 | h | 1 | -0.014 | -2.626 | -0.667 |
| HETATM | 36 | h | 1 | -1.306 | -3.878 | -0.600 |
| HETATM | 37 | h | 1 | -1.278 | -2.519 | 0.589  |
| HETATM | 38 | c | 1 | -1.943 | -2.450 | -2.747 |
| HETATM | 39 | h | 1 | -2.426 | -1.686 | -3.381 |
| HETATM | 40 | h | 1 | -2.468 | -3.420 | -2.892 |
| HETATM | 41 | h | 1 | -0.894 | -2.581 | -3.100 |
| HETATM | 42 | c | 1 | -4.627 | -1.053 | -1.931 |
| HETATM | 43 | h | 1 | -4.399 | -2.116 | -1.743 |
| HETATM | 44 | h | 1 | -4.997 | -0.945 | -2.974 |
| HETATM | 45 | h | 1 | -5.454 | -0.755 | -1.244 |
| HETATM | 46 | c | 1 | -3.695 | 1.199  | -1.637 |
| HETATM | 47 | h | 1 | -4.238 | 1.507  | -0.714 |
| HETATM | 48 | h | 1 | -4.301 | 1.495  | -2.518 |
| HETATM | 49 | h | 1 | -2.741 | 1.757  | -1.654 |
| HETATM | 50 | c | 1 | -1.353 | 2.390  | 2.010  |
| HETATM | 51 | h | 1 | -2.254 | 3.915  | 3.051  |
| HETATM | 52 | h | 1 | -0.764 | 3.346  | 3.741  |
| HETATM | 53 | c | 1 | 1.341  | -2.331 | 2.080  |
| HETATM | 54 | h | 1 | 2.238  | -3.829 | 3.161  |
| HETATM | 55 | h | 1 | 0.756  | -3.228 | 3.842  |

### Vibrational Properties:

| # | mode | symmetry | wave number | IR intensity | selection rules |
|---|------|----------|-------------|--------------|-----------------|
| # |      | cm**(-1) | km/mol      | IR           | RAMAN           |

Supplementary Material (ESI) for Dalton Transactions  
This journal is (c) The Royal Society of Chemistry 2008

|    |   |        |           |     |     |
|----|---|--------|-----------|-----|-----|
| 1  |   | 0.00   | 0.00000   | -   | -   |
| 2  |   | 0.00   | 0.00000   | -   | -   |
| 3  |   | 0.00   | 0.00000   | -   | -   |
| 4  |   | 0.00   | 0.00000   | -   | -   |
| 5  |   | 0.00   | 0.00000   | -   | -   |
| 6  |   | 0.00   | 0.00000   | -   | -   |
| 7  | a | 5.89   | 0.02282   | YES | YES |
| 8  | a | 15.83  | 1.43108   | YES | YES |
| 9  | a | 16.74  | 1.49606   | YES | YES |
| 10 | a | 33.78  | 0.51365   | YES | YES |
| 11 | a | 35.37  | 0.19863   | YES | YES |
| 12 | a | 42.51  | 1.01760   | YES | YES |
| 13 | a | 54.53  | 0.89882   | YES | YES |
| 14 | a | 58.46  | 7.68669   | YES | YES |
| 15 | a | 65.72  | 1.46270   | YES | YES |
| 16 | a | 71.75  | 2.52039   | YES | YES |
| 17 | a | 89.86  | 3.84772   | YES | YES |
| 18 | a | 105.16 | 0.03687   | YES | YES |
| 19 | a | 111.16 | 3.46862   | YES | YES |
| 20 | a | 113.82 | 2.52335   | YES | YES |
| 21 | a | 115.12 | 3.76261   | YES | YES |
| 22 | a | 127.28 | 2.70542   | YES | YES |
| 23 | a | 133.74 | 0.05473   | YES | YES |
| 24 | a | 138.58 | 2.63392   | YES | YES |
| 25 | a | 142.77 | 0.56264   | YES | YES |
| 26 | a | 146.13 | 1.23913   | YES | YES |
| 27 | a | 149.46 | 13.23689  | YES | YES |
| 28 | a | 157.31 | 13.22938  | YES | YES |
| 29 | a | 162.42 | 13.28089  | YES | YES |
| 30 | a | 171.64 | 6.19474   | YES | YES |
| 31 | a | 175.19 | 6.72304   | YES | YES |
| 32 | a | 183.50 | 1.54161   | YES | YES |
| 33 | a | 193.31 | 29.06001  | YES | YES |
| 34 | a | 207.68 | 0.63781   | YES | YES |
| 35 | a | 221.06 | 10.43380  | YES | YES |
| 36 | a | 237.74 | 1.08814   | YES | YES |
| 37 | a | 242.06 | 1.14184   | YES | YES |
| 38 | a | 251.88 | 0.65992   | YES | YES |
| 39 | a | 255.84 | 20.45163  | YES | YES |
| 40 | a | 283.28 | 22.77103  | YES | YES |
| 41 | a | 284.49 | 25.14583  | YES | YES |
| 42 | a | 288.75 | 16.11391  | YES | YES |
| 43 | a | 305.93 | 16.65063  | YES | YES |
| 44 | a | 308.65 | 4.61889   | YES | YES |
| 45 | a | 309.46 | 49.89551  | YES | YES |
| 46 | a | 360.71 | 1.10456   | YES | YES |
| 47 | a | 361.39 | 1.16251   | YES | YES |
| 48 | a | 371.84 | 9.58132   | YES | YES |
| 49 | a | 372.93 | 4.52661   | YES | YES |
| 50 | a | 404.26 | 298.27689 | YES | YES |
| 51 | a | 405.80 | 153.68046 | YES | YES |

Supplementary Material (ESI) for Dalton Transactions  
This journal is (c) The Royal Society of Chemistry 2008

|     |   |         |           |     |     |
|-----|---|---------|-----------|-----|-----|
| 52  | a | 425.23  | 8.99224   | YES | YES |
| 53  | a | 427.39  | 8.19205   | YES | YES |
| 54  | a | 506.57  | 9.73827   | YES | YES |
| 55  | a | 508.91  | 12.11646  | YES | YES |
| 56  | a | 540.44  | 5.40771   | YES | YES |
| 57  | a | 540.88  | 5.54708   | YES | YES |
| 58  | a | 570.39  | 0.78964   | YES | YES |
| 59  | a | 571.45  | 1.83570   | YES | YES |
| 60  | a | 608.15  | 2.81346   | YES | YES |
| 61  | a | 611.66  | 24.52128  | YES | YES |
| 62  | a | 668.75  | 53.31484  | YES | YES |
| 63  | a | 668.97  | 51.99213  | YES | YES |
| 64  | a | 725.82  | 5.88676   | YES | YES |
| 65  | a | 726.76  | 1.79296   | YES | YES |
| 66  | a | 759.41  | 3.38401   | YES | YES |
| 67  | a | 761.11  | 8.21703   | YES | YES |
| 68  | a | 773.95  | 10.27700  | YES | YES |
| 69  | a | 774.57  | 27.77911  | YES | YES |
| 70  | a | 916.83  | 7.02285   | YES | YES |
| 71  | a | 917.24  | 43.47860  | YES | YES |
| 72  | a | 976.73  | 15.95855  | YES | YES |
| 73  | a | 984.11  | 134.65957 | YES | YES |
| 74  | a | 1015.96 | 45.16681  | YES | YES |
| 75  | a | 1018.34 | 67.63492  | YES | YES |
| 76  | a | 1025.68 | 3.19097   | YES | YES |
| 77  | a | 1026.93 | 1.80023   | YES | YES |
| 78  | a | 1044.22 | 2.70178   | YES | YES |
| 79  | a | 1044.50 | 23.28943  | YES | YES |
| 80  | a | 1051.47 | 3.48245   | YES | YES |
| 81  | a | 1052.07 | 6.88228   | YES | YES |
| 82  | a | 1077.18 | 45.28808  | YES | YES |
| 83  | a | 1078.31 | 9.32284   | YES | YES |
| 84  | a | 1088.73 | 4.14151   | YES | YES |
| 85  | a | 1089.47 | 4.95630   | YES | YES |
| 86  | a | 1091.89 | 5.26486   | YES | YES |
| 87  | a | 1092.13 | 1.38593   | YES | YES |
| 88  | a | 1117.97 | 21.42644  | YES | YES |
| 89  | a | 1121.71 | 252.88914 | YES | YES |
| 90  | a | 1129.66 | 3.83099   | YES | YES |
| 91  | a | 1129.91 | 3.96067   | YES | YES |
| 92  | a | 1132.66 | 16.12888  | YES | YES |
| 93  | a | 1132.93 | 6.89582   | YES | YES |
| 94  | a | 1236.27 | 6.38679   | YES | YES |
| 95  | a | 1238.22 | 69.74346  | YES | YES |
| 96  | a | 1254.32 | 58.53340  | YES | YES |
| 97  | a | 1255.55 | 61.65390  | YES | YES |
| 98  | a | 1307.77 | 136.83040 | YES | YES |
| 99  | a | 1308.59 | 112.01417 | YES | YES |
| 100 | a | 1330.54 | 184.04204 | YES | YES |
| 101 | a | 1332.40 | 359.81329 | YES | YES |
| 102 | a | 1381.56 | 17.74449  | YES | YES |

Supplementary Material (ESI) for Dalton Transactions  
This journal is (c) The Royal Society of Chemistry 2008

|     |   |         |           |     |     |
|-----|---|---------|-----------|-----|-----|
| 103 | a | 1381.82 | 57.10805  | YES | YES |
| 104 | a | 1387.95 | 29.04201  | YES | YES |
| 105 | a | 1388.97 | 18.89557  | YES | YES |
| 106 | a | 1394.69 | 323.35515 | YES | YES |
| 107 | a | 1395.77 | 215.63189 | YES | YES |
| 108 | a | 1403.35 | 209.41858 | YES | YES |
| 109 | a | 1408.04 | 4.25342   | YES | YES |
| 110 | a | 1408.74 | 1.83644   | YES | YES |
| 111 | a | 1409.01 | 87.98617  | YES | YES |
| 112 | a | 1419.78 | 30.68769  | YES | YES |
| 113 | a | 1419.97 | 36.21399  | YES | YES |
| 114 | a | 1423.62 | 23.38238  | YES | YES |
| 115 | a | 1425.93 | 39.25876  | YES | YES |
| 116 | a | 1429.02 | 53.19107  | YES | YES |
| 117 | a | 1430.80 | 62.12457  | YES | YES |
| 118 | a | 1436.77 | 4.20238   | YES | YES |
| 119 | a | 1437.14 | 0.89771   | YES | YES |
| 120 | a | 1440.49 | 89.32684  | YES | YES |
| 121 | a | 1444.03 | 27.75481  | YES | YES |
| 122 | a | 1444.15 | 0.49974   | YES | YES |
| 123 | a | 1444.66 | 0.44451   | YES | YES |
| 124 | a | 1448.74 | 11.81071  | YES | YES |
| 125 | a | 1448.95 | 25.52470  | YES | YES |
| 126 | a | 1466.08 | 12.19045  | YES | YES |
| 127 | a | 1467.02 | 17.69386  | YES | YES |
| 128 | a | 1520.12 | 62.77694  | YES | YES |
| 129 | a | 1521.62 | 496.15445 | YES | YES |
| 130 | a | 1559.47 | 344.38418 | YES | YES |
| 131 | a | 1563.64 | 250.94444 | YES | YES |
| 132 | a | 1623.48 | 819.82118 | YES | YES |
| 133 | a | 1641.96 | 92.41575  | YES | YES |
| 134 | a | 1650.62 | 190.04763 | YES | YES |
| 135 | a | 1658.91 | 494.14145 | YES | YES |
| 136 | a | 2900.77 | 130.61540 | YES | YES |
| 137 | a | 2900.95 | 27.54641  | YES | YES |
| 138 | a | 2902.38 | 108.35104 | YES | YES |
| 139 | a | 2902.81 | 82.57098  | YES | YES |
| 140 | a | 2915.35 | 47.02653  | YES | YES |
| 141 | a | 2916.31 | 100.54396 | YES | YES |
| 142 | a | 2918.00 | 33.20293  | YES | YES |
| 143 | a | 2918.32 | 23.08605  | YES | YES |
| 144 | a | 2959.95 | 94.67173  | YES | YES |
| 145 | a | 2960.69 | 49.93689  | YES | YES |
| 146 | a | 2967.02 | 39.61090  | YES | YES |
| 147 | a | 2967.49 | 75.22146  | YES | YES |
| 148 | a | 2973.69 | 761.70386 | YES | YES |
| 149 | a | 2987.79 | 689.02597 | YES | YES |
| 150 | a | 2988.57 | 29.12372  | YES | YES |
| 151 | a | 2989.46 | 154.95548 | YES | YES |
| 152 | a | 2997.04 | 23.28174  | YES | YES |
| 153 | a | 2997.35 | 74.69884  | YES | YES |

|     |   |         |          |     |     |
|-----|---|---------|----------|-----|-----|
| 154 | a | 3066.47 | 8.76394  | YES | YES |
| 155 | a | 3067.24 | 8.29860  | YES | YES |
| 156 | a | 3072.69 | 10.17985 | YES | YES |
| 157 | a | 3073.25 | 12.32328 | YES | YES |
| 158 | a | 3075.37 | 1.49347  | YES | YES |
| 159 | a | 3076.07 | 3.06846  | YES | YES |
| 160 | a | 3081.62 | 1.54922  | YES | YES |
| 161 | a | 3083.69 | 1.53296  | YES | YES |
| 162 | a | 3449.31 | 17.53832 | YES | YES |
| 163 | a | 3450.56 | 18.14975 | YES | YES |
| 164 | a | 3565.11 | 19.33244 | YES | YES |
| 165 | a | 3566.04 | 18.05999 | YES | YES |

## BP/TZVPP

SCF energy = -2994.6592422710

### Coordinates in bor

|                   |                   |                   |    |
|-------------------|-------------------|-------------------|----|
| -0.00078841948073 | -0.01120280034866 | 1.79694789842220  | zn |
| -0.51133888636031 | 2.92832105808776  | 4.06892177623913  | o  |
| -4.21007414206205 | 4.42538991410974  | 2.40114778182014  | o  |
| 0.52185816655934  | -2.96594814283548 | 4.04713640627436  | o  |
| 4.20644049279739  | -4.45481116240332 | 2.34073180593220  | o  |
| 3.28393182306395  | 0.09777315782018  | -0.13971021317585 | n  |
| 4.15171102883516  | -1.54611754404000 | 0.50630910708425  | h  |
| 6.47921189976850  | 0.26215907074625  | -3.26103548951842 | n  |
| 3.85259759394959  | 3.75689533295034  | -2.58744261172522 | n  |
| -3.29452669310883 | -0.10549853322347 | -0.12480955643456 | n  |
| -4.16621680126422 | 1.52661280456265  | 0.54524286285468  | h  |
| -3.86269078128293 | -3.73282417871880 | -2.61974579401452 | n  |
| -6.47130244621455 | -0.21852063578743 | -3.26586263458475 | n  |
| -2.35633221402661 | 6.38181167699489  | 5.76626729439989  | n  |
| 2.36393109254085  | -6.44626307158149 | 5.69156685611033  | n  |
| 4.48612289078530  | 1.32161712857103  | -1.91310226860350 | c  |
| 6.89425108001023  | -2.45658238561333 | -3.07690968338477 | c  |
| 7.89859486703135  | -3.00359822479368 | -1.33320478056501 | h  |
| 8.02464871547892  | -3.06095010877505 | -4.70989946722283 | h  |
| 5.08546488387802  | -3.45897926594443 | -3.10208609216537 | h  |
| 8.78473365932781  | 1.71561296787771  | -3.71002531638857 | c  |
| 8.42558623948640  | 3.73105942001829  | -3.42904090733993 | h  |
| 9.47893776909889  | 1.41686206205674  | -5.64769271844454 | h  |
| 10.28653360059423 | 1.13030591780774  | -2.38519039876272 | h  |
| 3.87131643154027  | 4.57529680997941  | -5.21684201035794 | c  |
| 4.71839562921908  | 3.11853637668351  | -6.41350496669197 | h  |
| 4.93827248341026  | 6.34776761737843  | -5.44798908884203 | h  |
| 1.92072747668599  | 4.91528641800115  | -5.87346046893194 | h  |
| 2.29195434991865  | 5.28953176243721  | -0.91746270807812 | c  |
| 0.25677514866414  | 5.08209025485410  | -1.31926858973732 | h  |
| 2.80236900478223  | 7.28730955507985  | -1.17682102402466 | h  |



|                    |                   |                   |   |
|--------------------|-------------------|-------------------|---|
| 2.60797401643805   | 4.75884117226558  | 1.05488072365090  | h |
| -4.49121907295068  | -1.30282842230936 | -1.91909897733675 | c |
| -2.32051807421048  | -5.29363732773460 | -0.95803646563118 | c |
| -0.28189833333316  | -5.09365624957006 | -1.34545225496770 | h |
| -2.84229650744978  | -7.28468621283366 | -1.24440189342199 | h |
| -2.64633341164070  | -4.78349132365894 | 1.01799479994406  | h |
| -3.86423920948567  | -4.51620360818192 | -5.26008895007593 | c |
| -4.70019288575452  | -3.04175004694374 | -6.44259922738792 | h |
| -4.93254107616784  | -6.28367141942423 | -5.52156328494822 | h |
| -1.91000658753891  | -4.85123421641781 | -5.90759649341492 | h |
| -8.77761853171255  | -1.65818333149064 | -3.75390748092511 | c |
| -8.42887337129474  | -3.67940576097331 | -3.50296767494316 | h |
| -9.45772435777880  | -1.32638869499645 | -5.69130216660432 | h |
| -10.28847179116949 | -1.09140085328134 | -2.43103543202641 | h |
| -6.87832440094294  | 2.49848402823132  | -3.04807528489174 | c |
| -7.89730026276465  | 3.02449783178012  | -1.30607126095475 | h |
| -7.99113509280967  | 3.13125620548372  | -4.68278971324812 | h |
| -5.06523207444754  | 3.49391500983328  | -3.04166053025062 | h |
| -2.42576459246027  | 4.45830039280700  | 3.96420152602258  | c |
| -4.03297533384813  | 7.24558054382160  | 6.09438724747720  | h |
| -1.26607241869686  | 6.04598061495359  | 7.30507127098970  | h |
| 2.42960474266757   | -4.50145891272913 | 3.91268914084241  | c |
| 4.03913285468469   | -7.32074873125286 | 6.00033094815792  | h |
| 1.28239418397825   | -6.12545648884147 | 7.24005540837945  | h |

### Coordinates in Angstrom

|        |    |    |   |        |        |        |
|--------|----|----|---|--------|--------|--------|
| HETATM | 1  | zn | 1 | -0.000 | -0.006 | 0.951  |
| HETATM | 2  | o  | 1 | -0.271 | 1.550  | 2.153  |
| HETATM | 3  | o  | 1 | -2.228 | 2.342  | 1.271  |
| HETATM | 4  | o  | 1 | 0.276  | -1.570 | 2.142  |
| HETATM | 5  | o  | 1 | 2.226  | -2.357 | 1.239  |
| HETATM | 6  | n  | 1 | 1.738  | 0.052  | -0.074 |
| HETATM | 7  | h  | 1 | 2.197  | -0.818 | 0.268  |
| HETATM | 8  | n  | 1 | 3.429  | 0.139  | -1.726 |
| HETATM | 9  | n  | 1 | 2.039  | 1.988  | -1.369 |
| HETATM | 10 | n  | 1 | -1.743 | -0.056 | -0.066 |
| HETATM | 11 | h  | 1 | -2.205 | 0.808  | 0.289  |
| HETATM | 12 | n  | 1 | -2.044 | -1.975 | -1.386 |
| HETATM | 13 | n  | 1 | -3.424 | -0.116 | -1.728 |
| HETATM | 14 | n  | 1 | -1.247 | 3.377  | 3.051  |
| HETATM | 15 | n  | 1 | 1.251  | -3.411 | 3.012  |
| HETATM | 16 | c  | 1 | 2.374  | 0.699  | -1.012 |
| HETATM | 17 | c  | 1 | 3.648  | -1.300 | -1.628 |
| HETATM | 18 | h  | 1 | 4.180  | -1.589 | -0.706 |
| HETATM | 19 | h  | 1 | 4.246  | -1.620 | -2.492 |
| HETATM | 20 | h  | 1 | 2.691  | -1.830 | -1.642 |
| HETATM | 21 | c  | 1 | 4.649  | 0.908  | -1.963 |
| HETATM | 22 | h  | 1 | 4.459  | 1.974  | -1.815 |

|        |    |   |   |        |        |        |
|--------|----|---|---|--------|--------|--------|
| HETATM | 23 | h | 1 | 5.016  | 0.750  | -2.989 |
| HETATM | 24 | h | 1 | 5.443  | 0.598  | -1.262 |
| HETATM | 25 | c | 1 | 2.049  | 2.421  | -2.761 |
| HETATM | 26 | h | 1 | 2.497  | 1.650  | -3.394 |
| HETATM | 27 | h | 1 | 2.613  | 3.359  | -2.883 |
| HETATM | 28 | h | 1 | 1.016  | 2.601  | -3.108 |
| HETATM | 29 | c | 1 | 1.213  | 2.799  | -0.486 |
| HETATM | 30 | h | 1 | 0.136  | 2.689  | -0.698 |
| HETATM | 31 | h | 1 | 1.483  | 3.856  | -0.623 |
| HETATM | 32 | h | 1 | 1.380  | 2.518  | 0.558  |
| HETATM | 33 | c | 1 | -2.377 | -0.689 | -1.016 |
| HETATM | 34 | c | 1 | -1.228 | -2.801 | -0.507 |
| HETATM | 35 | h | 1 | -0.149 | -2.695 | -0.712 |
| HETATM | 36 | h | 1 | -1.504 | -3.855 | -0.659 |
| HETATM | 37 | h | 1 | -1.400 | -2.531 | 0.539  |
| HETATM | 38 | c | 1 | -2.045 | -2.390 | -2.784 |
| HETATM | 39 | h | 1 | -2.487 | -1.610 | -3.409 |
| HETATM | 40 | h | 1 | -2.610 | -3.325 | -2.922 |
| HETATM | 41 | h | 1 | -1.011 | -2.567 | -3.126 |
| HETATM | 42 | c | 1 | -4.645 | -0.877 | -1.986 |
| HETATM | 43 | h | 1 | -4.460 | -1.947 | -1.854 |
| HETATM | 44 | h | 1 | -5.005 | -0.702 | -3.012 |
| HETATM | 45 | h | 1 | -5.444 | -0.578 | -1.286 |
| HETATM | 46 | c | 1 | -3.640 | 1.322  | -1.613 |
| HETATM | 47 | h | 1 | -4.179 | 1.600  | -0.691 |
| HETATM | 48 | h | 1 | -4.229 | 1.657  | -2.478 |
| HETATM | 49 | h | 1 | -2.680 | 1.849  | -1.610 |
| HETATM | 50 | c | 1 | -1.284 | 2.359  | 2.098  |
| HETATM | 51 | h | 1 | -2.134 | 3.834  | 3.225  |
| HETATM | 52 | h | 1 | -0.670 | 3.199  | 3.866  |
| HETATM | 53 | c | 1 | 1.286  | -2.382 | 2.071  |
| HETATM | 54 | h | 1 | 2.137  | -3.874 | 3.175  |
| HETATM | 55 | h | 1 | 0.679  | -3.241 | 3.831  |

### B3LYP/SVP

SCF energy = -2991.9159862000

### Coordinates in bor

|                   |                   |                   |    |
|-------------------|-------------------|-------------------|----|
| -0.00312416080952 | 0.00834452278442  | 1.91579200504905  | zn |
| -0.61126984608674 | 3.00528919956784  | 4.03690392791444  | o  |
| -4.24103008851024 | 4.40678428847270  | 2.24504602777323  | o  |
| 0.61550599169187  | -2.96902685421834 | 4.06181109425045  | o  |
| 4.23856634941125  | -4.39175929082111 | 2.27271924395732  | o  |
| 3.26625546243320  | 0.18021299645467  | -0.11592802886870 | n  |
| 4.17397631554195  | -1.43133675819514 | 0.53072301254342  | h  |
| 6.45749486870299  | 0.39639918183549  | -3.21570122034223 | n  |
| 3.67323981168530  | 3.79172175243224  | -2.64132601391710 | n  |

|                    |                   |                   |   |
|--------------------|-------------------|-------------------|---|
| -3.28112962521259  | -0.18808099924232 | -0.09887242679532 | n |
| -4.19061699742030  | 1.42724000162895  | 0.53437805322884  | h |
| -3.66915573418501  | -3.81130053626158 | -2.60979791416517 | n |
| -6.45976881859689  | -0.42590690635819 | -3.21044868366796 | n |
| -2.53245944377877  | 6.46024751775620  | 5.59664873746150  | n |
| 2.54239919485360   | -6.40530178031405 | 5.65489083873994  | n |
| 4.41495961072899   | 1.40366997428933  | -1.90513736314442 | c |
| 6.93375506470567   | -2.30659350155261 | -3.04159236609975 | c |
| 7.91398779293505   | -2.85225647384753 | -1.27738618083818 | h |
| 8.10971595859078   | -2.88585361945347 | -4.65860951885120 | h |
| 5.14891322026018   | -3.36067189516399 | -3.10075449243195 | h |
| 8.70158127468678   | 1.92002521822521  | -3.69222759199137 | c |
| 8.28771806114448   | 3.92915923090642  | -3.40394654948460 | h |
| 9.39644732207056   | 1.65367704220252  | -5.64156820304780 | h |
| 10.24612126610382  | 1.39110453518906  | -2.38395383299974 | h |
| 3.63818174682731   | 4.53223817916084  | -5.28830669430210 | c |
| 4.52946963153381   | 3.07450285163642  | -6.45975835565417 | h |
| 4.63436335230050   | 6.34148401195674  | -5.59433224039809 | h |
| 1.66809435483640   | 4.77868546626237  | -5.94614009730497 | h |
| 2.06079754848662   | 5.29315951012928  | -0.99860839984467 | c |
| 0.02645416867083   | 4.94800879028110  | -1.33149987414028 | h |
| 2.43905469793267   | 7.31221386101545  | -1.34590318513664 | h |
| 2.44336094076125   | 4.86601602056273  | 0.99151060904862  | h |
| -4.42004101316699  | -1.42159507023696 | -1.88763421670553 | c |
| -2.06291662614597  | -5.30220001533617 | -0.95135085190558 | c |
| -0.02728614985960  | -4.96040610459747 | -1.27995770533223 | h |
| -2.44090346468171  | -7.32358271855964 | -1.28577482150099 | h |
| -2.45197665074547  | -4.86034469874294 | 1.03423020312115  | h |
| -3.61483197673763  | -4.56137656098894 | -5.25365384567835 | c |
| -4.50475103247320  | -3.11209328657747 | -6.43672440659937 | h |
| -4.60176850438762  | -6.37580025027408 | -5.55899055295161 | h |
| -1.63987087143358  | -4.80223943259001 | -5.89902389515185 | h |
| -8.69285766449795  | -1.96049488551320 | -3.70251012018622 | c |
| -8.27522657932397  | -3.96603763420112 | -3.39554564180841 | h |
| -9.36733625833365  | -1.71010460310398 | -5.66118883586411 | h |
| -10.25344399583532 | -1.42779057545675 | -2.41511678294700 | h |
| -6.94868313359219  | 2.27555572353870  | -3.04906718909784 | c |
| -7.95230504198154  | 2.82095700629251  | -1.29780973102224 | h |
| -8.10845963082270  | 2.84622362374149  | -4.68083446870961 | h |
| -5.16800141307766  | 3.33733721500703  | -3.08911081382109 | h |
| -2.52058627432582  | 4.51328998482871  | 3.84955816796767  | c |
| -4.18420037667866  | 7.40031019768986  | 5.81309138043677  | h |
| -1.42182035820843  | 6.25728941012262  | 7.14157322572439  | h |
| 2.52378935084578   | -4.47929315198675 | 3.88467807387934  | c |
| 4.19485365064512   | -7.34292926347750 | 5.87639701801111  | h |
| 1.43665703361040   | -6.18456679705508 | 7.20087315715465  | h |

### Coordinates in Angstrom

HETATM 1 zn 1 -0.002 0.004 1.014

|        |    |   |   |        |        |        |
|--------|----|---|---|--------|--------|--------|
| HETATM | 2  | o | 1 | -0.323 | 1.590  | 2.136  |
| HETATM | 3  | o | 1 | -2.244 | 2.332  | 1.188  |
| HETATM | 4  | o | 1 | 0.326  | -1.571 | 2.149  |
| HETATM | 5  | o | 1 | 2.243  | -2.324 | 1.203  |
| HETATM | 6  | n | 1 | 1.728  | 0.095  | -0.061 |
| HETATM | 7  | h | 1 | 2.209  | -0.757 | 0.281  |
| HETATM | 8  | n | 1 | 3.417  | 0.210  | -1.702 |
| HETATM | 9  | n | 1 | 1.944  | 2.006  | -1.398 |
| HETATM | 10 | n | 1 | -1.736 | -0.100 | -0.052 |
| HETATM | 11 | h | 1 | -2.218 | 0.755  | 0.283  |
| HETATM | 12 | n | 1 | -1.942 | -2.017 | -1.381 |
| HETATM | 13 | n | 1 | -3.418 | -0.225 | -1.699 |
| HETATM | 14 | n | 1 | -1.340 | 3.419  | 2.962  |
| HETATM | 15 | n | 1 | 1.345  | -3.390 | 2.992  |
| HETATM | 16 | c | 1 | 2.336  | 0.743  | -1.008 |
| HETATM | 17 | c | 1 | 3.669  | -1.221 | -1.610 |
| HETATM | 18 | h | 1 | 4.188  | -1.509 | -0.676 |
| HETATM | 19 | h | 1 | 4.291  | -1.527 | -2.465 |
| HETATM | 20 | h | 1 | 2.725  | -1.778 | -1.641 |
| HETATM | 21 | c | 1 | 4.605  | 1.016  | -1.954 |
| HETATM | 22 | h | 1 | 4.386  | 2.079  | -1.801 |
| HETATM | 23 | h | 1 | 4.972  | 0.875  | -2.985 |
| HETATM | 24 | h | 1 | 5.422  | 0.736  | -1.262 |
| HETATM | 25 | c | 1 | 1.925  | 2.398  | -2.798 |
| HETATM | 26 | h | 1 | 2.397  | 1.627  | -3.418 |
| HETATM | 27 | h | 1 | 2.452  | 3.356  | -2.960 |
| HETATM | 28 | h | 1 | 0.883  | 2.529  | -3.147 |
| HETATM | 29 | c | 1 | 1.091  | 2.801  | -0.528 |
| HETATM | 30 | h | 1 | 0.014  | 2.618  | -0.705 |
| HETATM | 31 | h | 1 | 1.291  | 3.869  | -0.712 |
| HETATM | 32 | h | 1 | 1.293  | 2.575  | 0.525  |
| HETATM | 33 | c | 1 | -2.339 | -0.752 | -0.999 |
| HETATM | 34 | c | 1 | -1.092 | -2.806 | -0.503 |
| HETATM | 35 | h | 1 | -0.014 | -2.625 | -0.677 |
| HETATM | 36 | h | 1 | -1.292 | -3.875 | -0.680 |
| HETATM | 37 | h | 1 | -1.298 | -2.572 | 0.547  |
| HETATM | 38 | c | 1 | -1.913 | -2.414 | -2.780 |
| HETATM | 39 | h | 1 | -2.384 | -1.647 | -3.406 |
| HETATM | 40 | h | 1 | -2.435 | -3.374 | -2.942 |
| HETATM | 41 | h | 1 | -0.868 | -2.541 | -3.122 |
| HETATM | 42 | c | 1 | -4.600 | -1.037 | -1.959 |
| HETATM | 43 | h | 1 | -4.379 | -2.099 | -1.797 |
| HETATM | 44 | h | 1 | -4.957 | -0.905 | -2.996 |
| HETATM | 45 | h | 1 | -5.426 | -0.756 | -1.278 |
| HETATM | 46 | c | 1 | -3.677 | 1.204  | -1.613 |
| HETATM | 47 | h | 1 | -4.208 | 1.493  | -0.687 |
| HETATM | 48 | h | 1 | -4.291 | 1.506  | -2.477 |
| HETATM | 49 | h | 1 | -2.735 | 1.766  | -1.635 |
| HETATM | 50 | c | 1 | -1.334 | 2.388  | 2.037  |
| HETATM | 51 | h | 1 | -2.214 | 3.916  | 3.076  |
| HETATM | 52 | h | 1 | -0.752 | 3.311  | 3.779  |

|        |    |   |   |       |        |       |
|--------|----|---|---|-------|--------|-------|
| HETATM | 53 | c | 1 | 1.336 | -2.370 | 2.056 |
| HETATM | 54 | h | 1 | 2.220 | -3.886 | 3.110 |
| HETATM | 55 | h | 1 | 0.760 | -3.273 | 3.811 |

## 6a

### BP/SVP

SCF energy = -2756.1782869450

### Coordinates in bor:

|                   |                   |                   |    |
|-------------------|-------------------|-------------------|----|
| 0.19219437952396  | -0.23723243089447 | -0.06320837320866 | zn |
| -5.48945188132566 | -1.31475772276645 | -1.55561077319621 | o  |
| 3.65175292790213  | -4.24678507561725 | 0.15628431040492  | o  |
| -1.46811996771918 | -1.29014569359285 | -3.16544837193501 | o  |
| 0.36134593001890  | -2.91130060939625 | 2.55692677885177  | o  |
| -3.90020301694303 | -1.68953618429362 | -3.26430337159635 | c  |
| 2.13423765909225  | -4.50335760057749 | 1.97315805302674  | c  |
| -4.71922058589944 | -2.54138541269347 | -5.62173384260490 | n  |
| -6.47047849978435 | -3.34469301430551 | -5.65630776094116 | h  |
| -3.38529215329325 | -3.32239669763256 | -6.77453474279083 | h  |
| 2.34471116261482  | -6.58931895302223 | 3.53368007488764  | n  |
| 0.84476774323125  | -7.01892390097299 | 4.66340312302226  | h  |
| 3.42067642897755  | -8.04984215055460 | 2.88776861353336  | h  |
| -1.66853700280248 | 2.69341733379093  | 1.69833010203905  | n  |
| -4.02784092261027 | 2.31223567692517  | 2.36067448145510  | c  |
| -4.72312851574376 | 0.08879999221312  | 3.55359665269447  | n  |
| -3.14633424715362 | -1.01828975928527 | 3.85857862097995  | h  |
| -5.87928513217328 | -0.90031602801784 | 2.31860492197067  | h  |
| -5.90822721538598 | 4.06670411773016  | 2.03544959031278  | n  |
| -5.77619448878513 | 5.24182355418441  | 0.51080896157746  | h  |
| -7.69718324007011 | 3.49542154195982  | 2.47696746276026  | h  |
| -0.79971620839116 | 5.03186884920270  | 0.58215249414694  | c  |
| -1.37314350873146 | 6.72702065699739  | 1.69661321485436  | h  |
| -1.58595644621804 | 5.27648255051552  | -1.36732652076881 | h  |
| 2.11264357517666  | 4.94290692766345  | 0.39891194435939  | c  |
| 2.92471848334965  | 5.33963200580348  | 2.30570757875499  | h  |
| 2.72032778228350  | 6.52313312851295  | -0.86799655933652 | h  |
| 2.94313109455338  | 2.47880698516579  | -0.51107039610697 | n  |
| 5.33449056360413  | 2.11947348558050  | -1.12521488048517 | c  |
| 7.09536663510614  | 4.05401591259820  | -1.06736095497883 | n  |
| 6.40782517096367  | 5.85437183009072  | -1.13870343025927 | h  |
| 8.71822851316214  | 3.80128977333354  | -2.07938869395905 | h  |
| 6.16298066265382  | -0.21081921307562 | -1.81211640686481 | n  |
| 5.08941279198997  | -1.77386153703847 | -1.17792121791995 | h  |
| 8.06884804595867  | -0.49602424672673 | -1.84827665132825 | h  |

### Coordinates in Angstrom

|        |    |    |   |        |        |        |
|--------|----|----|---|--------|--------|--------|
| HETATM | 1  | zn | 1 | 0.102  | -0.126 | -0.033 |
| HETATM | 2  | o  | 1 | -2.905 | -0.696 | -0.823 |
| HETATM | 3  | o  | 1 | 1.932  | -2.247 | 0.083  |
| HETATM | 4  | o  | 1 | -0.777 | -0.683 | -1.675 |
| HETATM | 5  | o  | 1 | 0.191  | -1.541 | 1.353  |
| HETATM | 6  | c  | 1 | -2.064 | -0.894 | -1.727 |
| HETATM | 7  | c  | 1 | 1.129  | -2.383 | 1.044  |
| HETATM | 8  | n  | 1 | -2.497 | -1.345 | -2.975 |
| HETATM | 9  | h  | 1 | -3.424 | -1.770 | -2.993 |
| HETATM | 10 | h  | 1 | -1.791 | -1.758 | -3.585 |
| HETATM | 11 | n  | 1 | 1.241  | -3.487 | 1.870  |
| HETATM | 12 | h  | 1 | 0.447  | -3.714 | 2.468  |
| HETATM | 13 | h  | 1 | 1.810  | -4.260 | 1.528  |
| HETATM | 14 | n  | 1 | -0.883 | 1.425  | 0.899  |
| HETATM | 15 | c  | 1 | -2.131 | 1.224  | 1.249  |
| HETATM | 16 | n  | 1 | -2.499 | 0.047  | 1.880  |
| HETATM | 17 | h  | 1 | -1.665 | -0.539 | 2.042  |
| HETATM | 18 | h  | 1 | -3.111 | -0.476 | 1.227  |
| HETATM | 19 | n  | 1 | -3.126 | 2.152  | 1.077  |
| HETATM | 20 | h  | 1 | -3.057 | 2.774  | 0.270  |
| HETATM | 21 | h  | 1 | -4.073 | 1.850  | 1.311  |
| HETATM | 22 | c  | 1 | -0.423 | 2.663  | 0.308  |
| HETATM | 23 | h  | 1 | -0.727 | 3.560  | 0.898  |
| HETATM | 24 | h  | 1 | -0.839 | 2.792  | -0.724 |
| HETATM | 25 | c  | 1 | 1.118  | 2.616  | 0.211  |
| HETATM | 26 | h  | 1 | 1.548  | 2.826  | 1.220  |
| HETATM | 27 | h  | 1 | 1.440  | 3.452  | -0.459 |
| HETATM | 28 | n  | 1 | 1.557  | 1.312  | -0.270 |
| HETATM | 29 | c  | 1 | 2.823  | 1.122  | -0.595 |
| HETATM | 30 | n  | 1 | 3.755  | 2.145  | -0.565 |
| HETATM | 31 | h  | 1 | 3.391  | 3.098  | -0.603 |
| HETATM | 32 | h  | 1 | 4.613  | 2.012  | -1.100 |
| HETATM | 33 | n  | 1 | 3.261  | -0.112 | -0.959 |
| HETATM | 34 | h  | 1 | 2.693  | -0.939 | -0.623 |
| HETATM | 35 | h  | 1 | 4.270  | -0.262 | -0.978 |

### Vibrational Properties

| #  | mode | symmetry | wave number | IR intensity | selection rules |
|----|------|----------|-------------|--------------|-----------------|
| #  |      | cm**(-1) | km/mol      | IR           | RAMAN           |
| 1  |      | 0.00     | 0.00000     | -            | -               |
| 2  |      | 0.00     | 0.00000     | -            | -               |
| 3  |      | 0.00     | 0.00000     | -            | -               |
| 4  |      | 0.00     | 0.00000     | -            | -               |
| 5  |      | 0.00     | 0.00000     | -            | -               |
| 6  |      | 0.00     | 0.00000     | -            | -               |
| 7  | a    | 4.19     | 14.17008    | YES          | YES             |
| 8  | a    | 32.07    | 8.18339     | YES          | YES             |
| 9  | a    | 32.55    | 7.31578     | YES          | YES             |
| 10 | a    | 38.40    | 2.78306     | YES          | YES             |

Supplementary Material (ESI) for Dalton Transactions  
This journal is (c) The Royal Society of Chemistry 2008

|    |   |         |           |     |     |
|----|---|---------|-----------|-----|-----|
| 11 | a | 47.86   | 10.19720  | YES | YES |
| 12 | a | 50.59   | 1.06194   | YES | YES |
| 13 | a | 72.57   | 4.50400   | YES | YES |
| 14 | a | 79.31   | 28.98562  | YES | YES |
| 15 | a | 91.79   | 1.62312   | YES | YES |
| 16 | a | 98.72   | 6.19560   | YES | YES |
| 17 | a | 121.43  | 7.73091   | YES | YES |
| 18 | a | 140.16  | 0.43518   | YES | YES |
| 19 | a | 157.36  | 4.75605   | YES | YES |
| 20 | a | 164.87  | 13.63971  | YES | YES |
| 21 | a | 179.88  | 21.73959  | YES | YES |
| 22 | a | 197.44  | 7.87465   | YES | YES |
| 23 | a | 218.06  | 38.77743  | YES | YES |
| 24 | a | 231.72  | 15.32734  | YES | YES |
| 25 | a | 264.96  | 12.38992  | YES | YES |
| 26 | a | 280.29  | 10.65228  | YES | YES |
| 27 | a | 299.17  | 49.07130  | YES | YES |
| 28 | a | 316.42  | 21.80202  | YES | YES |
| 29 | a | 322.84  | 111.02485 | YES | YES |
| 30 | a | 326.68  | 77.82115  | YES | YES |
| 31 | a | 362.25  | 190.43971 | YES | YES |
| 32 | a | 388.47  | 49.74738  | YES | YES |
| 33 | a | 409.66  | 167.79307 | YES | YES |
| 34 | a | 427.21  | 105.07899 | YES | YES |
| 35 | a | 446.48  | 72.11211  | YES | YES |
| 36 | a | 454.77  | 138.18268 | YES | YES |
| 37 | a | 461.65  | 174.03770 | YES | YES |
| 38 | a | 496.86  | 78.97840  | YES | YES |
| 39 | a | 498.84  | 28.33771  | YES | YES |
| 40 | a | 505.09  | 3.10579   | YES | YES |
| 41 | a | 526.74  | 27.41132  | YES | YES |
| 42 | a | 557.30  | 1.33025   | YES | YES |
| 43 | a | 567.98  | 2.47062   | YES | YES |
| 44 | a | 570.19  | 0.11291   | YES | YES |
| 45 | a | 582.47  | 7.52025   | YES | YES |
| 46 | a | 604.27  | 23.57475  | YES | YES |
| 47 | a | 655.37  | 17.59948  | YES | YES |
| 48 | a | 668.89  | 19.81248  | YES | YES |
| 49 | a | 684.76  | 34.99639  | YES | YES |
| 50 | a | 701.96  | 7.13672   | YES | YES |
| 51 | a | 766.73  | 25.28005  | YES | YES |
| 52 | a | 770.33  | 16.84974  | YES | YES |
| 53 | a | 826.56  | 19.83174  | YES | YES |
| 54 | a | 840.46  | 137.60483 | YES | YES |
| 55 | a | 919.09  | 141.99424 | YES | YES |
| 56 | a | 932.22  | 224.80744 | YES | YES |
| 57 | a | 984.67  | 7.95470   | YES | YES |
| 58 | a | 1008.52 | 4.17429   | YES | YES |
| 59 | a | 1021.48 | 4.28252   | YES | YES |
| 60 | a | 1031.00 | 8.55167   | YES | YES |
| 61 | a | 1055.09 | 2.20330   | YES | YES |

|     |   |         |            |     |     |
|-----|---|---------|------------|-----|-----|
| 62  | a | 1056.02 | 8.33805    | YES | YES |
| 63  | a | 1064.39 | 13.11418   | YES | YES |
| 64  | a | 1068.59 | 26.58595   | YES | YES |
| 65  | a | 1070.26 | 9.52844    | YES | YES |
| 66  | a | 1090.63 | 29.51790   | YES | YES |
| 67  | a | 1112.55 | 32.46973   | YES | YES |
| 68  | a | 1191.25 | 35.47755   | YES | YES |
| 69  | a | 1209.65 | 3.27011    | YES | YES |
| 70  | a | 1223.38 | 2.05916    | YES | YES |
| 71  | a | 1247.69 | 0.70323    | YES | YES |
| 72  | a | 1327.11 | 47.53926   | YES | YES |
| 73  | a | 1339.28 | 34.87243   | YES | YES |
| 74  | a | 1383.16 | 476.42239  | YES | YES |
| 75  | a | 1411.46 | 28.48980   | YES | YES |
| 76  | a | 1419.39 | 73.90883   | YES | YES |
| 77  | a | 1422.42 | 292.03821  | YES | YES |
| 78  | a | 1439.80 | 27.32737   | YES | YES |
| 79  | a | 1472.56 | 56.13026   | YES | YES |
| 80  | a | 1532.01 | 248.16035  | YES | YES |
| 81  | a | 1545.98 | 344.10138  | YES | YES |
| 82  | a | 1571.43 | 39.15642   | YES | YES |
| 83  | a | 1576.38 | 234.08118  | YES | YES |
| 84  | a | 1593.52 | 136.32255  | YES | YES |
| 85  | a | 1597.41 | 90.85742   | YES | YES |
| 86  | a | 1638.21 | 162.37973  | YES | YES |
| 87  | a | 1655.39 | 98.49052   | YES | YES |
| 88  | a | 1680.28 | 1313.61922 | YES | YES |
| 89  | a | 1698.29 | 241.92768  | YES | YES |
| 90  | a | 2868.99 | 18.80678   | YES | YES |
| 91  | a | 2876.47 | 119.83379  | YES | YES |
| 92  | a | 2925.37 | 103.17985  | YES | YES |
| 93  | a | 2931.44 | 1193.17139 | YES | YES |
| 94  | a | 2945.68 | 52.63461   | YES | YES |
| 95  | a | 3329.02 | 147.21695  | YES | YES |
| 96  | a | 3411.77 | 117.00178  | YES | YES |
| 97  | a | 3488.88 | 38.68474   | YES | YES |
| 98  | a | 3491.16 | 13.24912   | YES | YES |
| 99  | a | 3491.62 | 20.87722   | YES | YES |
| 100 | a | 3505.59 | 23.62689   | YES | YES |
| 101 | a | 3560.19 | 41.88133   | YES | YES |
| 102 | a | 3599.86 | 34.86345   | YES | YES |
| 103 | a | 3604.98 | 37.48439   | YES | YES |
| 104 | a | 3622.64 | 19.19205   | YES | YES |
| 105 | a | 3637.45 | 29.90904   | YES | YES |

BP/TZVPP

SCF energy = -2757.5557522230

**Coordinates in bor**



|                   |                   |                   |    |
|-------------------|-------------------|-------------------|----|
| 0.16785537595136  | -0.27108045571210 | -0.06071945611375 | zn |
| -5.15932718502256 | -1.60176774232132 | -1.75700263217469 | o  |
| 4.05180285110043  | -4.05918033373442 | 0.26501744903146  | o  |
| -1.15726869899283 | -1.29021190591500 | -3.33965278006043 | o  |
| 0.54137222442081  | -2.97904247031545 | 2.48683868164946  | o  |
| -3.56326997772617 | -1.82480636947091 | -3.47671542609755 | c  |
| 2.45798124301815  | -4.43056877311655 | 1.98461114843305  | c  |
| -4.32026592054418 | -2.62484540559437 | -5.87559668423037 | n  |
| -5.98563870049086 | -3.56876267723586 | -5.91614122320742 | h  |
| -2.93450678577515 | -3.32394312998638 | -6.99870211150558 | h  |
| 2.73915613678012  | -6.49700778326783 | 3.56688736370353  | n  |
| 1.19062011136104  | -7.05330294064478 | 4.54391138766217  | h  |
| 3.89536202827047  | -7.88076181815121 | 2.92789680092476  | h  |
| -1.95463395305472 | 2.48308859271754  | 1.69556321101438  | n  |
| -4.26744451239078 | 2.01695753410335  | 2.40745884999860  | c  |
| -4.81279424263679 | -0.16786711362720 | 3.71809500939866  | n  |
| -3.25174258685658 | -1.29651376104311 | 3.88350779857519  | h  |
| -6.24599931230460 | -1.16126127881121 | 2.89629109512357  | h  |
| -6.23286550233302 | 3.68261556266773  | 2.09872053415440  | n  |
| -6.20635534686574 | 4.75598638951114  | 0.51154070487315  | h  |
| -7.97172490335103 | 3.05821098100030  | 2.60764995059495  | h  |
| -1.23651664931989 | 4.89046486899728  | 0.59320897696478  | c  |
| -1.97187422082559 | 6.50876329695316  | 1.68569736798767  | h  |
| -1.96459748212254 | 5.05940730789431  | -1.36237151136330 | h  |
| 1.67020709845642  | 5.03375817769202  | 0.51389464410561  | c  |
| 2.37819147025099  | 5.44656302541933  | 2.43441470148340  | h  |
| 2.18322266786973  | 6.65369954586562  | -0.70774976488869 | h  |
| 2.71991717746860  | 2.65302071875175  | -0.40061367077846 | n  |
| 5.11142827410584  | 2.51094185287340  | -1.03302437076178 | c  |
| 6.72587189106608  | 4.56959492051499  | -0.95139419465095 | n  |
| 5.89809814439848  | 6.29691835607398  | -0.99720995298865 | h  |
| 8.30251238494558  | 4.45575747317951  | -2.03643358240265 | h  |
| 6.13153021947830  | 0.27544428540035  | -1.77761622783814 | n  |
| 5.21743058053585  | -1.36238085881738 | -1.15738814180760 | h  |
| 8.04335960312788  | 0.15768425794268  | -1.76941758365267 | h  |

### Coordinates in Angstrom

|        |    |    |   |        |        |        |
|--------|----|----|---|--------|--------|--------|
| HETATM | 1  | zn | 1 | 0.089  | -0.143 | -0.032 |
| HETATM | 2  | o  | 1 | -2.730 | -0.848 | -0.930 |
| HETATM | 3  | o  | 1 | 2.144  | -2.148 | 0.140  |
| HETATM | 4  | o  | 1 | -0.612 | -0.683 | -1.767 |
| HETATM | 5  | o  | 1 | 0.286  | -1.576 | 1.316  |
| HETATM | 6  | c  | 1 | -1.886 | -0.966 | -1.840 |
| HETATM | 7  | c  | 1 | 1.301  | -2.345 | 1.050  |
| HETATM | 8  | n  | 1 | -2.286 | -1.389 | -3.109 |
| HETATM | 9  | h  | 1 | -3.167 | -1.889 | -3.131 |
| HETATM | 10 | h  | 1 | -1.553 | -1.759 | -3.704 |
| HETATM | 11 | n  | 1 | 1.449  | -3.438 | 1.888  |

|        |    |   |   |        |        |        |
|--------|----|---|---|--------|--------|--------|
| HETATM | 12 | h | 1 | 0.630  | -3.732 | 2.405  |
| HETATM | 13 | h | 1 | 2.061  | -4.170 | 1.549  |
| HETATM | 14 | n | 1 | -1.034 | 1.314  | 0.897  |
| HETATM | 15 | c | 1 | -2.258 | 1.067  | 1.274  |
| HETATM | 16 | n | 1 | -2.547 | -0.089 | 1.968  |
| HETATM | 17 | h | 1 | -1.721 | -0.686 | 2.055  |
| HETATM | 18 | h | 1 | -3.305 | -0.615 | 1.533  |
| HETATM | 19 | n | 1 | -3.298 | 1.949  | 1.111  |
| HETATM | 20 | h | 1 | -3.284 | 2.517  | 0.271  |
| HETATM | 21 | h | 1 | -4.218 | 1.618  | 1.380  |
| HETATM | 22 | c | 1 | -0.654 | 2.588  | 0.314  |
| HETATM | 23 | h | 1 | -1.043 | 3.444  | 0.892  |
| HETATM | 24 | h | 1 | -1.040 | 2.677  | -0.721 |
| HETATM | 25 | c | 1 | 0.884  | 2.664  | 0.272  |
| HETATM | 26 | h | 1 | 1.258  | 2.882  | 1.288  |
| HETATM | 27 | h | 1 | 1.155  | 3.521  | -0.375 |
| HETATM | 28 | n | 1 | 1.439  | 1.404  | -0.212 |
| HETATM | 29 | c | 1 | 2.705  | 1.329  | -0.547 |
| HETATM | 30 | n | 1 | 3.559  | 2.418  | -0.503 |
| HETATM | 31 | h | 1 | 3.121  | 3.332  | -0.528 |
| HETATM | 32 | h | 1 | 4.393  | 2.358  | -1.078 |
| HETATM | 33 | n | 1 | 3.245  | 0.146  | -0.941 |
| HETATM | 34 | h | 1 | 2.761  | -0.721 | -0.612 |
| HETATM | 35 | h | 1 | 4.256  | 0.083  | -0.936 |

## B3LYP/SVP

SCF energy = -2756.1782805940

## Coordinates in bor

|                   |                   |                   |    |
|-------------------|-------------------|-------------------|----|
| 0.18909410776431  | -0.23723109509706 | -0.07077408916454 | zn |
| -5.45674185071442 | -1.32881821868116 | -1.57236578286500 | o  |
| 3.73660984475775  | -4.23274765174182 | 0.17517373530613  | o  |
| -1.43941022760183 | -1.29724506345508 | -3.18990561895686 | o  |
| 0.39346040801665  | -2.92307188594988 | 2.52109282484934  | o  |
| -3.87501487519935 | -1.68304696944753 | -3.29062199447583 | c  |
| 2.18306758172370  | -4.50499955308875 | 1.95839852981985  | c  |
| -4.70117476032459 | -2.49263684673131 | -5.66092753695003 | n  |
| -6.45400907130967 | -3.29220869577244 | -5.70354169075279 | h  |
| -3.37213953234145 | -3.25914128186185 | -6.82907958878517 | h  |
| 2.37238997163396  | -6.59850741440777 | 3.51181204754673  | n  |
| 0.85166950212520  | -7.04168846205149 | 4.60752749755939  | h  |
| 3.46632535861228  | -8.05080461214955 | 2.87790342667048  | h  |
| -1.70225720359774 | 2.65729717127513  | 1.69947186361257  | n  |
| -4.05051429863616 | 2.25376477827927  | 2.38257690836718  | c  |
| -4.71488700042363 | 0.01755141107045  | 3.56866362654027  | n  |
| -3.13048531114801 | -1.08629118634400 | 3.84327788855730  | h  |
| -5.89337487976892 | -0.96681345766117 | 2.35438611418923  | h  |

|                   |                   |                   |   |
|-------------------|-------------------|-------------------|---|
| -5.94649794761126 | 3.99868346724990  | 2.09364602149411  | n |
| -5.84643001855216 | 5.17431205593877  | 0.56686881440927  | h |
| -7.72491891846366 | 3.41544360734010  | 2.56093818565345  | h |
| -0.85324013485005 | 5.01627068118482  | 0.60633511012291  | c |
| -1.44650011751102 | 6.69430522304932  | 1.73505879589332  | h |
| -1.63644779011843 | 5.26968138341358  | -1.34244095020545 | h |
| 2.05972556914803  | 4.95451979995793  | 0.43245859881373  | c |
| 2.86215019584182  | 5.33725112533161  | 2.34577898127951  | h |
| 2.65744710797758  | 6.55382425419925  | -0.81509573058902 | h |
| 2.91405475824276  | 2.50710349469707  | -0.50035691914099 | n |
| 5.30867356923407  | 2.17050593844423  | -1.11445462704369 | c |
| 7.05174978263539  | 4.12130326056475  | -1.04674260116012 | n |
| 6.34755246669788  | 5.91515450505854  | -1.10825781861430 | h |
| 8.67745912974415  | 3.88895867754819  | -2.05845694090730 | h |
| 6.15870125938980  | -0.14894517692032 | -1.81178277202142 | n |
| 5.10843521525582  | -1.72767818980140 | -1.17460420637197 | h |
| 8.06794949504073  | -0.41184938651633 | -1.85156274361285 | h |

### Coordinates in Angstrom

|        |    |    |   |        |        |        |
|--------|----|----|---|--------|--------|--------|
| HETATM | 1  | zn | 1 | 0.100  | -0.126 | -0.037 |
| HETATM | 2  | o  | 1 | -2.888 | -0.703 | -0.832 |
| HETATM | 3  | o  | 1 | 1.977  | -2.240 | 0.093  |
| HETATM | 4  | o  | 1 | -0.762 | -0.686 | -1.688 |
| HETATM | 5  | o  | 1 | 0.208  | -1.547 | 1.334  |
| HETATM | 6  | c  | 1 | -2.051 | -0.891 | -1.741 |
| HETATM | 7  | c  | 1 | 1.155  | -2.384 | 1.036  |
| HETATM | 8  | n  | 1 | -2.488 | -1.319 | -2.996 |
| HETATM | 9  | h  | 1 | -3.415 | -1.742 | -3.018 |
| HETATM | 10 | h  | 1 | -1.784 | -1.725 | -3.614 |
| HETATM | 11 | n  | 1 | 1.255  | -3.492 | 1.858  |
| HETATM | 12 | h  | 1 | 0.451  | -3.726 | 2.438  |
| HETATM | 13 | h  | 1 | 1.834  | -4.260 | 1.523  |
| HETATM | 14 | n  | 1 | -0.901 | 1.406  | 0.899  |
| HETATM | 15 | c  | 1 | -2.143 | 1.193  | 1.261  |
| HETATM | 16 | n  | 1 | -2.495 | 0.009  | 1.888  |
| HETATM | 17 | h  | 1 | -1.657 | -0.575 | 2.034  |
| HETATM | 18 | h  | 1 | -3.119 | -0.512 | 1.246  |
| HETATM | 19 | n  | 1 | -3.147 | 2.116  | 1.108  |
| HETATM | 20 | h  | 1 | -3.094 | 2.738  | 0.300  |
| HETATM | 21 | h  | 1 | -4.088 | 1.807  | 1.355  |
| HETATM | 22 | c  | 1 | -0.452 | 2.654  | 0.321  |
| HETATM | 23 | h  | 1 | -0.765 | 3.542  | 0.918  |
| HETATM | 24 | h  | 1 | -0.866 | 2.789  | -0.710 |
| HETATM | 25 | c  | 1 | 1.090  | 2.622  | 0.229  |
| HETATM | 26 | h  | 1 | 1.515  | 2.824  | 1.241  |
| HETATM | 27 | h  | 1 | 1.406  | 3.468  | -0.431 |
| HETATM | 28 | n  | 1 | 1.542  | 1.327  | -0.265 |
| HETATM | 29 | c  | 1 | 2.809  | 1.149  | -0.590 |
| HETATM | 30 | n  | 1 | 3.732  | 2.181  | -0.554 |
| HETATM | 31 | h  | 1 | 3.359  | 3.130  | -0.586 |

|        |    |   |   |       |        |        |
|--------|----|---|---|-------|--------|--------|
| HETATM | 32 | h | 1 | 4.592 | 2.058  | -1.089 |
| HETATM | 33 | n | 1 | 3.259 | -0.079 | -0.959 |
| HETATM | 34 | h | 1 | 2.703 | -0.914 | -0.622 |
| HETATM | 35 | h | 1 | 4.269 | -0.218 | -0.980 |

## 6b

### BP/SVP

SCF energy = -3069.1983011220

### Coordinates in bor

|                    |                   |                   |    |
|--------------------|-------------------|-------------------|----|
| -0.03234708307209  | 0.94980699940924  | -0.16641225573834 | zn |
| -2.62817180571522  | -2.00402597407019 | 0.37672970785667  | n  |
| -6.09481997173177  | -0.21675045944055 | 2.44171121200286  | n  |
| -6.75223943822999  | -3.56984607095963 | -0.35758545437955 | n  |
| -1.43560812715560  | -4.34043910031191 | -0.47413485852648 | c  |
| -1.47819261746650  | -4.53038776550418 | -2.55552911898422 | h  |
| -2.39936641816754  | -6.01534795428143 | 0.31724038601694  | h  |
| -5.07315519867768  | -1.90554252492848 | 0.78331935993456  | c  |
| -4.44606963165803  | 3.74221334474291  | -1.35620138860951 | o  |
| -0.69050126122241  | 3.00419170149825  | -3.19691907951847 | o  |
| -2.88504198058763  | 4.08567169589847  | -3.06657712428397 | c  |
| -3.44857907384721  | 5.66316671943625  | -5.07815760102279 | n  |
| -1.98437811598803  | 6.28036776621368  | -6.14414673556003 | h  |
| -4.89861387566650  | 6.88077682686475  | -4.80632756671599 | h  |
| 0.89065868157742   | 3.08388100237002  | 2.69871288430982  | o  |
| 5.05494109260423   | 2.11844856018830  | 2.92020109930870  | o  |
| 3.16020591775982   | 3.32263641338313  | 3.58448794760122  | c  |
| 3.35397839713126   | 5.08353982540175  | 5.51767251890781  | n  |
| 5.12372328450508   | 5.66997803484604  | 5.94580427707660  | h  |
| 1.94600278301404   | 6.37042255044489  | 5.67089268119939  | h  |
| -4.50316585956132  | 1.06943620887752  | 4.28166636429496  | c  |
| -2.92686407881930  | -0.15360219192399 | 4.84025032266714  | h  |
| -5.65706255981699  | 1.51397447527552  | 5.95960465007362  | h  |
| -3.70672646433703  | 2.82896304056753  | 3.51066148056789  | h  |
| -8.43880956507849  | 1.11740422615603  | 1.86227754974534  | c  |
| -7.99304797404455  | 3.07973905201922  | 1.33230890471125  | h  |
| -9.72488850280306  | 1.09475989154420  | 3.50494538687783  | h  |
| -9.39172326470753  | 0.24438653750511  | 0.24526321860937  | h  |
| -8.88573536605877  | -4.66086696196683 | 0.97457423893960  | c  |
| -8.74591500878115  | -4.23427208960460 | 2.99934215040575  | h  |
| -8.89061087822526  | -6.73688244462177 | 0.73841454283648  | h  |
| -10.72299674495358 | -3.94403775372457 | 0.27628512083305  | h  |
| -6.55339568636599  | -4.16595092175168 | -3.02737497331000 | c  |
| -5.19317737794361  | -2.89329934472247 | -3.93654590315068 | h  |

|                   |                   |                   |   |
|-------------------|-------------------|-------------------|---|
| -8.40565647774800 | -3.88261657086715 | -3.95098747841433 | h |
| -5.96564996740846 | -6.14153379873849 | -3.37600675155471 | h |
| 2.50501104174894  | -2.04193863995481 | -0.69152459831304 | n |
| 3.42274337876641  | 2.31565616895069  | -4.54490963858469 | h |
| 1.33850206949195  | -4.30319614019683 | 0.34940907869842  | c |
| 4.96473478854830  | -1.85365289454563 | -0.95271563572627 | c |
| 4.49980626065610  | 0.56542540051490  | -4.89023716616752 | c |
| 1.38977581551951  | -4.33243743129484 | 2.43934620518222  | h |
| 2.30381954701933  | -6.03497008394172 | -0.31114099585893 | h |
| 5.96838559397738  | -0.23856763717549 | -2.70801149794066 | n |
| 6.66422036259451  | -3.30532014568455 | 0.39014588324719  | n |
| 3.12927164807400  | -0.90702790992800 | -5.39283671024867 | h |
| 5.79785655295759  | 0.86802023164130  | -6.49433189764722 | h |
| 8.14301371494856  | 1.33603731048125  | -2.09810330287730 | c |
| 9.00787794749523  | -4.20779709804028 | -0.71205154522926 | c |
| 6.35307318898284  | -3.71724995947270 | 3.09119769822241  | c |
| 7.61533848812869  | 3.34431453445671  | -2.28337883143012 | h |
| 9.75790378706635  | 0.95949860710615  | -3.36919600463304 | h |
| 8.69775038245280  | 1.05251481631564  | -0.12510696000334 | h |
| 8.94440417698981  | -4.01506072157635 | -2.77596763384169 | h |
| 9.27119987405698  | -6.22699184418557 | -0.25170293255531 | h |
| 10.68205372448272 | -3.17533350705763 | -0.00219808820508 | h |
| 5.01650382245748  | -2.32795481482544 | 3.84609353347988  | h |
| 8.17806537963384  | -3.38136655725590 | 4.04273538285649  | h |
| 5.73725722191753  | -5.66143860640107 | 3.54766942827069  | h |

### Coordinates in Angstrom

|        |    |    |   |        |        |        |
|--------|----|----|---|--------|--------|--------|
| HETATM | 1  | zn | 1 | -0.017 | 0.503  | -0.088 |
| HETATM | 2  | n  | 1 | -1.391 | -1.060 | 0.199  |
| HETATM | 3  | n  | 1 | -3.225 | -0.115 | 1.292  |
| HETATM | 4  | n  | 1 | -3.573 | -1.889 | -0.189 |
| HETATM | 5  | c  | 1 | -0.760 | -2.297 | -0.251 |
| HETATM | 6  | h  | 1 | -0.782 | -2.397 | -1.352 |
| HETATM | 7  | h  | 1 | -1.270 | -3.183 | 0.168  |
| HETATM | 8  | c  | 1 | -2.685 | -1.008 | 0.415  |
| HETATM | 9  | o  | 1 | -2.353 | 1.980  | -0.718 |
| HETATM | 10 | o  | 1 | -0.365 | 1.590  | -1.692 |
| HETATM | 11 | c  | 1 | -1.527 | 2.162  | -1.623 |
| HETATM | 12 | n  | 1 | -1.825 | 2.997  | -2.687 |
| HETATM | 13 | h  | 1 | -1.050 | 3.323  | -3.251 |
| HETATM | 14 | h  | 1 | -2.592 | 3.641  | -2.543 |
| HETATM | 15 | o  | 1 | 0.471  | 1.632  | 1.428  |
| HETATM | 16 | o  | 1 | 2.675  | 1.121  | 1.545  |
| HETATM | 17 | c  | 1 | 1.672  | 1.758  | 1.897  |
| HETATM | 18 | n  | 1 | 1.775  | 2.690  | 2.920  |
| HETATM | 19 | h  | 1 | 2.711  | 3.000  | 3.146  |
| HETATM | 20 | h  | 1 | 1.030  | 3.371  | 3.001  |
| HETATM | 21 | c  | 1 | -2.383 | 0.566  | 2.266  |
| HETATM | 22 | h  | 1 | -1.549 | -0.081 | 2.561  |

|        |    |   |   |        |        |        |
|--------|----|---|---|--------|--------|--------|
| HETATM | 23 | h | 1 | -2.994 | 0.801  | 3.154  |
| HETATM | 24 | h | 1 | -1.962 | 1.497  | 1.858  |
| HETATM | 25 | c | 1 | -4.466 | 0.591  | 0.985  |
| HETATM | 26 | h | 1 | -4.230 | 1.630  | 0.705  |
| HETATM | 27 | h | 1 | -5.146 | 0.579  | 1.855  |
| HETATM | 28 | h | 1 | -4.970 | 0.129  | 0.130  |
| HETATM | 29 | c | 1 | -4.702 | -2.466 | 0.516  |
| HETATM | 30 | h | 1 | -4.628 | -2.241 | 1.587  |
| HETATM | 31 | h | 1 | -4.705 | -3.565 | 0.391  |
| HETATM | 32 | h | 1 | -5.674 | -2.087 | 0.146  |
| HETATM | 33 | c | 1 | -3.468 | -2.205 | -1.602 |
| HETATM | 34 | h | 1 | -2.748 | -1.531 | -2.083 |
| HETATM | 35 | h | 1 | -4.448 | -2.055 | -2.091 |
| HETATM | 36 | h | 1 | -3.157 | -3.250 | -1.787 |
| HETATM | 37 | n | 1 | 1.326  | -1.081 | -0.366 |
| HETATM | 38 | h | 1 | 1.811  | 1.225  | -2.405 |
| HETATM | 39 | c | 1 | 0.708  | -2.277 | 0.185  |
| HETATM | 40 | c | 1 | 2.627  | -0.981 | -0.504 |
| HETATM | 41 | c | 1 | 2.381  | 0.299  | -2.588 |
| HETATM | 42 | h | 1 | 0.735  | -2.293 | 1.291  |
| HETATM | 43 | h | 1 | 1.219  | -3.194 | -0.165 |
| HETATM | 44 | n | 1 | 3.158  | -0.126 | -1.433 |
| HETATM | 45 | n | 1 | 3.527  | -1.749 | 0.206  |
| HETATM | 46 | h | 1 | 1.656  | -0.480 | -2.854 |
| HETATM | 47 | h | 1 | 3.068  | 0.459  | -3.437 |
| HETATM | 48 | c | 1 | 4.309  | 0.707  | -1.110 |
| HETATM | 49 | c | 1 | 4.767  | -2.227 | -0.377 |
| HETATM | 50 | c | 1 | 3.362  | -1.967 | 1.636  |
| HETATM | 51 | h | 1 | 4.030  | 1.770  | -1.208 |
| HETATM | 52 | h | 1 | 5.164  | 0.508  | -1.783 |
| HETATM | 53 | h | 1 | 4.603  | 0.557  | -0.066 |
| HETATM | 54 | h | 1 | 4.733  | -2.125 | -1.469 |
| HETATM | 55 | h | 1 | 4.906  | -3.295 | -0.133 |
| HETATM | 56 | h | 1 | 5.653  | -1.680 | -0.001 |
| HETATM | 57 | h | 1 | 2.655  | -1.232 | 2.035  |
| HETATM | 58 | h | 1 | 4.328  | -1.789 | 2.139  |
| HETATM | 59 | h | 1 | 3.036  | -2.996 | 1.877  |

## BP/TZVPP

SCF energy = -3072.0735297590

## Coordinates in bor

|                   |                   |                   |    |
|-------------------|-------------------|-------------------|----|
| -0.03210910891534 | 0.94950108029048  | -0.16435232018028 | zn |
| -2.61244601453960 | -1.97802048560574 | 0.40928458963106  | n  |
| -6.11832167991709 | -0.25137561524889 | 2.47802008138266  | n  |
| -6.72550392360536 | -3.58536509668323 | -0.35780618325826 | n  |
| -1.40870656858674 | -4.32968451658241 | -0.41641497798478 | c  |
| -1.43551139756630 | -4.53241392826879 | -2.49346280972870 | h  |

|                    |                   |                   |   |
|--------------------|-------------------|-------------------|---|
| -2.37803165614772  | -5.98905107000947 | 0.38898960895145  | h |
| -5.07322746112051  | -1.91390922430760 | 0.80413175419945  | c |
| -4.41917718335761  | 3.80981067350047  | -1.38799179048780 | o |
| -0.68600230367557  | 2.89992492832243  | -3.29378942638530 | o |
| -2.87617973180923  | 4.02381549520684  | -3.15645655205148 | c |
| -3.48109485380654  | 5.48429439513107  | -5.27103579680151 | n |
| -1.99653400600822  | 6.07588630575046  | -6.32777713873982 | h |
| -4.85034752152695  | 6.78873275012473  | -4.96951142799175 | h |
| 0.80265307491553   | 3.19898024061166  | 2.65819967976946  | o |
| 5.03893649989560   | 2.36937279753118  | 2.77349330011609  | o |
| 3.10061203714576   | 3.49608401024546  | 3.49555200666236  | c |
| 3.26548369044585   | 5.23044802234513  | 5.48684833975787  | n |
| 5.02424565082074   | 5.92507672231362  | 5.79018041956953  | h |
| 1.84081302821291   | 6.50777755373681  | 5.59633683431472  | h |
| -4.54799692323766  | 1.01672374045396  | 4.35581945075588  | c |
| -2.97209560880822  | -0.20770466720177 | 4.89526143011946  | h |
| -5.71987351765693  | 1.41121956474636  | 6.02726308327834  | h |
| -3.76864707941258  | 2.79807128428223  | 3.62690507443697  | h |
| -8.46647420965292  | 1.08272201916611  | 1.89536228794507  | c |
| -8.02662880932168  | 3.05052478486471  | 1.39345719601475  | h |
| -9.74748383935501  | 1.04262946806570  | 3.53395634268022  | h |
| -9.40632314822645  | 0.21330581539876  | 0.27499495821566  | h |
| -8.91037559349733  | -4.65042225945113 | 0.92055119454088  | c |
| -8.82313434007679  | -4.20294109552911 | 2.93807096146837  | h |
| -8.91437584204844  | -6.72214969504779 | 0.69857906710252  | h |
| -10.71205737297366 | -3.92713652705206 | 0.15578972513376  | h |
| -6.47916429943259  | -4.18015536255562 | -3.03024599572544 | c |
| -5.08832698734536  | -2.92123365280608 | -3.89915616509761 | h |
| -8.30713780590824  | -3.87346736750521 | -3.98109859399676 | h |
| -5.90766236006239  | -6.15817066209217 | -3.35853095634306 | h |
| 2.51922933439298   | -2.00928660622434 | -0.63038437954831 | n |
| 3.60518816360780   | 2.28847860435892  | -4.56292510039378 | h |
| 1.35390918412658   | -4.27335848696046 | 0.43664239708733  | c |
| 4.99373993501965   | -1.87387606015932 | -0.89782799730174 | c |
| 4.55483252227636   | 0.46742931363465  | -4.88774374516335 | c |
| 1.38724202377337   | -4.27136877299545 | 2.52431541425655  | h |
| 2.33511948801134   | -5.99865602573861 | -0.20095012910864 | h |
| 6.03426419378244   | -0.35295860977712 | -2.71441122803456 | n |
| 6.65863419460096   | -3.30439484064456 | 0.51070988198535  | n |
| 3.09336818462858   | -0.93494863674695 | -5.30082619060853 | h |
| 5.82705541160456   | 0.64768717391555  | -6.52360050344535 | h |
| 8.26476689602630   | 1.17849403578021  | -2.17778578262218 | c |
| 8.99752430303404   | -4.30325541012210 | -0.52926694928503 | c |
| 6.30235138590606   | -3.60766380747685 | 3.22522780247183  | c |
| 7.76336810804361   | 3.19288199629038  | -2.29849802601064 | h |
| 9.79498805770257   | 0.78785249447062  | -3.53532322439671 | h |
| 8.91601463946045   | 0.83120539458284  | -0.24964759145632 | h |
| 8.95957258885409   | -4.16925890638441 | -2.59351719720368 | h |
| 9.19254627085616   | -6.30750905068075 | -0.00025072304848 | h |
| 10.68071546087143  | -3.29231577816174 | 0.17545810897036  | h |
| 4.97004573448890   | -2.17529064180769 | 3.89578571389878  | h |

8.11617184870526 -3.26560946091967 4.18412918645246 h  
5.64623522860499 -5.51852067195371 3.73731131466102 h

### Coordinates in Angstrom

|        |    |    |   |        |        |        |
|--------|----|----|---|--------|--------|--------|
| HETATM | 1  | zn | 1 | -0.017 | 0.502  | -0.087 |
| HETATM | 2  | n  | 1 | -1.382 | -1.047 | 0.217  |
| HETATM | 3  | n  | 1 | -3.238 | -0.133 | 1.311  |
| HETATM | 4  | n  | 1 | -3.559 | -1.897 | -0.189 |
| HETATM | 5  | c  | 1 | -0.745 | -2.291 | -0.220 |
| HETATM | 6  | h  | 1 | -0.760 | -2.398 | -1.319 |
| HETATM | 7  | h  | 1 | -1.258 | -3.169 | 0.206  |
| HETATM | 8  | c  | 1 | -2.685 | -1.013 | 0.426  |
| HETATM | 9  | o  | 1 | -2.339 | 2.016  | -0.734 |
| HETATM | 10 | o  | 1 | -0.363 | 1.535  | -1.743 |
| HETATM | 11 | c  | 1 | -1.522 | 2.129  | -1.670 |
| HETATM | 12 | n  | 1 | -1.842 | 2.902  | -2.789 |
| HETATM | 13 | h  | 1 | -1.057 | 3.215  | -3.349 |
| HETATM | 14 | h  | 1 | -2.567 | 3.592  | -2.630 |
| HETATM | 15 | o  | 1 | 0.425  | 1.693  | 1.407  |
| HETATM | 16 | o  | 1 | 2.666  | 1.254  | 1.468  |
| HETATM | 17 | c  | 1 | 1.641  | 1.850  | 1.850  |
| HETATM | 18 | n  | 1 | 1.728  | 2.768  | 2.904  |
| HETATM | 19 | h  | 1 | 2.659  | 3.135  | 3.064  |
| HETATM | 20 | h  | 1 | 0.974  | 3.444  | 2.961  |
| HETATM | 21 | c  | 1 | -2.407 | 0.538  | 2.305  |
| HETATM | 22 | h  | 1 | -1.573 | -0.110 | 2.590  |
| HETATM | 23 | h  | 1 | -3.027 | 0.747  | 3.189  |
| HETATM | 24 | h  | 1 | -1.994 | 1.481  | 1.919  |
| HETATM | 25 | c  | 1 | -4.480 | 0.573  | 1.003  |
| HETATM | 26 | h  | 1 | -4.248 | 1.614  | 0.737  |
| HETATM | 27 | h  | 1 | -5.158 | 0.552  | 1.870  |
| HETATM | 28 | h  | 1 | -4.978 | 0.113  | 0.146  |
| HETATM | 29 | c  | 1 | -4.715 | -2.461 | 0.487  |
| HETATM | 30 | h  | 1 | -4.669 | -2.224 | 1.555  |
| HETATM | 31 | h  | 1 | -4.717 | -3.557 | 0.370  |
| HETATM | 32 | h  | 1 | -5.669 | -2.078 | 0.082  |
| HETATM | 33 | c  | 1 | -3.429 | -2.212 | -1.604 |
| HETATM | 34 | h  | 1 | -2.693 | -1.546 | -2.063 |
| HETATM | 35 | h  | 1 | -4.396 | -2.050 | -2.107 |
| HETATM | 36 | h  | 1 | -3.126 | -3.259 | -1.777 |
| HETATM | 37 | n  | 1 | 1.333  | -1.063 | -0.334 |
| HETATM | 38 | h  | 1 | 1.908  | 1.211  | -2.415 |
| HETATM | 39 | c  | 1 | 0.716  | -2.261 | 0.231  |
| HETATM | 40 | c  | 1 | 2.643  | -0.992 | -0.475 |
| HETATM | 41 | c  | 1 | 2.410  | 0.247  | -2.586 |
| HETATM | 42 | h  | 1 | 0.734  | -2.260 | 1.336  |
| HETATM | 43 | h  | 1 | 1.236  | -3.174 | -0.106 |
| HETATM | 44 | n  | 1 | 3.193  | -0.187 | -1.436 |
| HETATM | 45 | n  | 1 | 3.524  | -1.749 | 0.270  |



|        |    |   |   |       |        |        |
|--------|----|---|---|-------|--------|--------|
| HETATM | 46 | h | 1 | 1.637 | -0.495 | -2.805 |
| HETATM | 47 | h | 1 | 3.084 | 0.343  | -3.452 |
| HETATM | 48 | c | 1 | 4.374 | 0.624  | -1.152 |
| HETATM | 49 | c | 1 | 4.761 | -2.277 | -0.280 |
| HETATM | 50 | c | 1 | 3.335 | -1.909 | 1.707  |
| HETATM | 51 | h | 1 | 4.108 | 1.690  | -1.216 |
| HETATM | 52 | h | 1 | 5.183 | 0.417  | -1.871 |
| HETATM | 53 | h | 1 | 4.718 | 0.440  | -0.132 |
| HETATM | 54 | h | 1 | 4.741 | -2.206 | -1.372 |
| HETATM | 55 | h | 1 | 4.864 | -3.338 | -0.000 |
| HETATM | 56 | h | 1 | 5.652 | -1.742 | 0.093  |
| HETATM | 57 | h | 1 | 2.630 | -1.151 | 2.062  |
| HETATM | 58 | h | 1 | 4.295 | -1.728 | 2.214  |
| HETATM | 59 | h | 1 | 2.988 | -2.920 | 1.978  |

### B3LYP/SVP

SCF energy = -3069.1983011220

### Coordinates in bor

|                   |                   |                   |    |
|-------------------|-------------------|-------------------|----|
| -0.03234708307209 | 0.94980699940924  | -0.16641225573834 | zn |
| -2.62817180571522 | -2.00402597407019 | 0.37672970785667  | n  |
| -6.09481997173177 | -0.21675045944055 | 2.44171121200286  | n  |
| -6.75223943822999 | -3.56984607095963 | -0.35758545437955 | n  |
| -1.43560812715560 | -4.34043910031191 | -0.47413485852648 | c  |
| -1.47819261746650 | -4.53038776550418 | -2.55552911898422 | h  |
| -2.39936641816754 | -6.01534795428143 | 0.31724038601694  | h  |
| -5.07315519867768 | -1.90554252492848 | 0.78331935993456  | c  |
| -4.44606963165803 | 3.74221334474291  | -1.35620138860951 | o  |
| -0.69050126122241 | 3.00419170149825  | -3.19691907951847 | o  |
| -2.88504198058763 | 4.08567169589847  | -3.06657712428397 | c  |
| -3.44857907384721 | 5.66316671943625  | -5.07815760102279 | n  |
| -1.98437811598803 | 6.28036776621368  | -6.14414673556003 | h  |
| -4.89861387566650 | 6.88077682686475  | -4.80632756671599 | h  |
| 0.89065868157742  | 3.08388100237002  | 2.69871288430982  | o  |
| 5.05494109260423  | 2.11844856018830  | 2.92020109930870  | o  |
| 3.16020591775982  | 3.32263641338313  | 3.58448794760122  | c  |
| 3.35397839713126  | 5.08353982540175  | 5.51767251890781  | n  |
| 5.12372328450508  | 5.66997803484604  | 5.94580427707660  | h  |
| 1.94600278301404  | 6.37042255044489  | 5.67089268119939  | h  |
| -4.50316585956132 | 1.06943620887752  | 4.28166636429496  | c  |
| -2.92686407881930 | -0.15360219192399 | 4.84025032266714  | h  |
| -5.65706255981699 | 1.51397447527552  | 5.95960465007362  | h  |
| -3.70672646433703 | 2.82896304056753  | 3.51066148056789  | h  |
| -8.43880956507849 | 1.11740422615603  | 1.86227754974534  | c  |
| -7.99304797404455 | 3.07973905201922  | 1.33230890471125  | h  |
| -9.72488850280306 | 1.09475989154420  | 3.50494538687783  | h  |
| -9.39172326470753 | 0.24438653750511  | 0.24526321860937  | h  |

|                    |                   |                   |   |
|--------------------|-------------------|-------------------|---|
| -8.88573536605877  | -4.66086696196683 | 0.97457423893960  | c |
| -8.74591500878115  | -4.23427208960460 | 2.99934215040575  | h |
| -8.89061087822526  | -6.73688244462177 | 0.73841454283648  | h |
| -10.72299674495358 | -3.94403775372457 | 0.27628512083305  | h |
| -6.55339568636599  | -4.16595092175168 | -3.02737497331000 | c |
| -5.19317737794361  | -2.89329934472247 | -3.93654590315068 | h |
| -8.40565647774800  | -3.88261657086715 | -3.95098747841433 | h |
| -5.96564996740846  | -6.14153379873849 | -3.37600675155471 | h |
| 2.50501104174894   | -2.04193863995481 | -0.69152459831304 | n |
| 3.42274337876641   | 2.31565616895069  | -4.54490963858469 | h |
| 1.33850206949195   | -4.30319614019683 | 0.34940907869842  | c |
| 4.96473478854830   | -1.85365289454563 | -0.95271563572627 | c |
| 4.49980626065610   | 0.56542540051490  | -4.89023716616752 | c |
| 1.38977581551951   | -4.33243743129484 | 2.43934620518222  | h |
| 2.30381954701933   | -6.03497008394172 | -0.31114099585893 | h |
| 5.96838559397738   | -0.23856763717549 | -2.70801149794066 | n |
| 6.66422036259451   | -3.30532014568455 | 0.39014588324719  | n |
| 3.12927164807400   | -0.90702790992800 | -5.39283671024867 | h |
| 5.79785655295759   | 0.86802023164130  | -6.49433189764722 | h |
| 8.14301371494856   | 1.33603731048125  | -2.09810330287730 | c |
| 9.00787794749523   | -4.20779709804028 | -0.71205154522926 | c |
| 6.35307318898284   | -3.71724995947270 | 3.09119769822241  | c |
| 7.61533848812869   | 3.34431453445671  | -2.28337883143012 | h |
| 9.75790378706635   | 0.95949860710615  | -3.36919600463304 | h |
| 8.69775038245280   | 1.05251481631564  | -0.12510696000334 | h |
| 8.94440417698981   | -4.01506072157635 | -2.77596763384169 | h |
| 9.27119987405698   | -6.22699184418557 | -0.25170293255531 | h |
| 10.68205372448272  | -3.17533350705763 | -0.00219808820508 | h |
| 5.01650382245748   | -2.32795481482544 | 3.84609353347988  | h |
| 8.17806537963384   | -3.38136655725590 | 4.04273538285649  | h |
| 5.73725722191753   | -5.66143860640107 | 3.54766942827069  | h |

### Coordinates in Angstrom

|        |    |    |   |        |        |        |
|--------|----|----|---|--------|--------|--------|
| HETATM | 1  | zn | 1 | -0.017 | 0.503  | -0.088 |
| HETATM | 2  | n  | 1 | -1.391 | -1.060 | 0.199  |
| HETATM | 3  | n  | 1 | -3.225 | -0.115 | 1.292  |
| HETATM | 4  | n  | 1 | -3.573 | -1.889 | -0.189 |
| HETATM | 5  | c  | 1 | -0.760 | -2.297 | -0.251 |
| HETATM | 6  | h  | 1 | -0.782 | -2.397 | -1.352 |
| HETATM | 7  | h  | 1 | -1.270 | -3.183 | 0.168  |
| HETATM | 8  | c  | 1 | -2.685 | -1.008 | 0.415  |
| HETATM | 9  | o  | 1 | -2.353 | 1.980  | -0.718 |
| HETATM | 10 | o  | 1 | -0.365 | 1.590  | -1.692 |
| HETATM | 11 | c  | 1 | -1.527 | 2.162  | -1.623 |
| HETATM | 12 | n  | 1 | -1.825 | 2.997  | -2.687 |
| HETATM | 13 | h  | 1 | -1.050 | 3.323  | -3.251 |
| HETATM | 14 | h  | 1 | -2.592 | 3.641  | -2.543 |
| HETATM | 15 | o  | 1 | 0.471  | 1.632  | 1.428  |
| HETATM | 16 | o  | 1 | 2.675  | 1.121  | 1.545  |

Supplementary Material (ESI) for Dalton Transactions  
This journal is (c) The Royal Society of Chemistry 2008

|        |    |   |   |        |        |        |
|--------|----|---|---|--------|--------|--------|
| HETATM | 17 | c | 1 | 1.672  | 1.758  | 1.897  |
| HETATM | 18 | n | 1 | 1.775  | 2.690  | 2.920  |
| HETATM | 19 | h | 1 | 2.711  | 3.000  | 3.146  |
| HETATM | 20 | h | 1 | 1.030  | 3.371  | 3.001  |
| HETATM | 21 | c | 1 | -2.383 | 0.566  | 2.266  |
| HETATM | 22 | h | 1 | -1.549 | -0.081 | 2.561  |
| HETATM | 23 | h | 1 | -2.994 | 0.801  | 3.154  |
| HETATM | 24 | h | 1 | -1.962 | 1.497  | 1.858  |
| HETATM | 25 | c | 1 | -4.466 | 0.591  | 0.985  |
| HETATM | 26 | h | 1 | -4.230 | 1.630  | 0.705  |
| HETATM | 27 | h | 1 | -5.146 | 0.579  | 1.855  |
| HETATM | 28 | h | 1 | -4.970 | 0.129  | 0.130  |
| HETATM | 29 | c | 1 | -4.702 | -2.466 | 0.516  |
| HETATM | 30 | h | 1 | -4.628 | -2.241 | 1.587  |
| HETATM | 31 | h | 1 | -4.705 | -3.565 | 0.391  |
| HETATM | 32 | h | 1 | -5.674 | -2.087 | 0.146  |
| HETATM | 33 | c | 1 | -3.468 | -2.205 | -1.602 |
| HETATM | 34 | h | 1 | -2.748 | -1.531 | -2.083 |
| HETATM | 35 | h | 1 | -4.448 | -2.055 | -2.091 |
| HETATM | 36 | h | 1 | -3.157 | -3.250 | -1.787 |
| HETATM | 37 | n | 1 | 1.326  | -1.081 | -0.366 |
| HETATM | 38 | h | 1 | 1.811  | 1.225  | -2.405 |
| HETATM | 39 | c | 1 | 0.708  | -2.277 | 0.185  |
| HETATM | 40 | c | 1 | 2.627  | -0.981 | -0.504 |
| HETATM | 41 | c | 1 | 2.381  | 0.299  | -2.588 |
| HETATM | 42 | h | 1 | 0.735  | -2.293 | 1.291  |
| HETATM | 43 | h | 1 | 1.219  | -3.194 | -0.165 |
| HETATM | 44 | n | 1 | 3.158  | -0.126 | -1.433 |
| HETATM | 45 | n | 1 | 3.527  | -1.749 | 0.206  |
| HETATM | 46 | h | 1 | 1.656  | -0.480 | -2.854 |
| HETATM | 47 | h | 1 | 3.068  | 0.459  | -3.437 |
| HETATM | 48 | c | 1 | 4.309  | 0.707  | -1.110 |
| HETATM | 49 | c | 1 | 4.767  | -2.227 | -0.377 |
| HETATM | 50 | c | 1 | 3.362  | -1.967 | 1.636  |
| HETATM | 51 | h | 1 | 4.030  | 1.770  | -1.208 |
| HETATM | 52 | h | 1 | 5.164  | 0.508  | -1.783 |
| HETATM | 53 | h | 1 | 4.603  | 0.557  | -0.066 |
| HETATM | 54 | h | 1 | 4.733  | -2.125 | -1.469 |
| HETATM | 55 | h | 1 | 4.906  | -3.295 | -0.133 |
| HETATM | 56 | h | 1 | 5.653  | -1.680 | -0.001 |
| HETATM | 57 | h | 1 | 2.655  | -1.232 | 2.035  |
| HETATM | 58 | h | 1 | 4.328  | -1.789 | 2.139  |
| HETATM | 59 | h | 1 | 3.036  | -2.996 | 1.877  |
